## **Evolution with a seed bank: the population genetic consequences of microbial dormancy**

2

WR Shoemaker and JT Lennon

4

Indiana University, Department of Biology

corresponding authors: wrshoema@indiana.edu and lennonj@indiana.edu

6

8

10

12

14

16

18

20

22

24

## ABSTRACT

Dormancy is a bet-hedging strategy that allows organisms to persist through conditions that are sub-optimal for growth and reproduction by entering a reversible state of reduced metabolic activity. Dormancy allows a population to maintain a reservoir of genetic and phenotypic diversity (i.e., a seed bank) that can contribute to the long-term survival of a population. This strategy can be potentially adaptive and has long been of interest to ecologists and evolutionary biologists. However, comparatively little is known about how dormancy influences the fundamental evolutionary forces of genetic drift, mutation, selection, recombination, and gene flow. Here, we investigate how seed banks affect the processes underpinning evolution by reviewing existing theory, implementing novel simulations, and determining how and when dormancy can influence evolution as a population genetic process. We extend our analysis to examine how seed banks can alter macroevolutionary processes, including rates of speciation and extinction. Through the lens of population genetic theory, we can understand the extent that seed banks influence microbial evolutionary dynamics.

38

**KEYWORDS:** microorganisms, evolution, population genetics, macroevolution, seed banks, dormancy, bacteria, bet-hedging

42

44

46

## INTRODUCTION

48 Nature is rarely predictable. Resource availability, disease pressure, and temperature are  
just a few of the abiotic and biotic factors that fluctuate over space and time. Variation in these,  
50 and other factors have important consequences for the growth, survival, and reproduction of  
individuals. Many taxa respond to variable environmental conditions by entering a reversible  
52 state of reduced metabolic activity, a phenomenon known as dormancy (Lennon & Jones, 2011).  
Dormancy is an adaptive trait that has independently evolved multiple times across the tree of  
54 life (Guppy & Withers, 1999). By entering a dormant state, individuals can endure conditions  
that are suboptimal for growth and reproduction, thereby increasing a population's long-term  
56 geometric fitness (Cohen, 1966). However, dormancy comes at a cost. Not only do dormant  
individuals miss out on opportunities to reproduce, they must also invest endogenous resources  
58 into resting structures and maintenance energy requirements (Bradshaw et al., 1998; Cáceres &  
Tessier, 2004; van Bodegom, 2007). Despite these costs, dormant individuals accumulate in  
60 many systems resulting in the formation of a seed bank (Locey et al., 2017), which serves as a  
reservoir of genetic and phenotypic diversity (Fig. 1). Seed banks have important implications  
62 for a range of ecological processes and patterns, perhaps the most central being the maintenance  
of biodiversity. Dormancy preserves diversity by reducing interspecific competition allowing for  
64 coexistence, a mechanism known as the storage effect (Chesson & Warner, 1981; Chesson,  
1994). In addition, seed bank mediated diversity has consequences for other important ecological  
66 phenomena including successional dynamics (Marks, 1974; Bazzaz, 1979; Lennon & Jones,  
2011), community stability (Kalamees & Zobel, 2002), and ecosystem processes (Wang et al.,  
68 2014).

Dormancy has important consequences for evolution. For example, rates of phenotypic  
70 evolution are reduced in in populations of freshwater zooplankton that are able to persist in a  
dormant state (Hairston & De Stasio, 1988). Similarly, dormancy is associated with a higher rate  
72 of lineage diversification in plants (Willis et al., 2014). However, to fully understand its  
influence on evolution, it is necessary to understand how dormancy affects the fundamental  
74 forces that govern the rate and direction that allele frequencies change over multiple generations.  
Evolution is a population genetic process governed by both deterministic and stochastic forces,  
76 the relative strengths of which dictate how genetic diversity is generated, lost, and maintained.  
Because dormancy as a life history strategy can provide a fitness benefit, it is subject to the  
78 deterministic force of selection (Cohen, 1966; Templeton & Levin, 1979; Brown & Venable,  
1986). The ecological implications of dormancy have been extensively studied, particularly the  
80 extent that dormancy can outweigh the population genetic effects of alternative life history  
strategies (Venable & Lawlor, 1980; Venable & Brown, 1988; Olivieri, 2001; Buoro & Carlson,  
82 2014; de Casas et al., 2015). However, far less progress has been made towards understanding  
how dormancy influences the stochastic forces of evolution (i.e., genetic drift, mutation, and  
84 recombination) that operate within a population. To gain a complete understanding of how  
dormancy influences evolutionary dynamics it is necessary to consider how dormancy affects the  
86 stochastic and deterministic forces that underpin evolutionary biology.

While dormancy likely influences eco-evolutionary dynamics for taxa across the tree of  
88 life (Hairston et al., 1999; Willis et al., 2014), it could have a particularly large effect on  
microorganisms, including bacteria, archaea and microeukaryotes, which collectively are, the  
90 most abundant and diverse taxa on the planet. Microorganisms have evolved a diverse set of  
mechanisms that allow individuals to enter and exit a dormant state. These mechanisms include

92 but are not limited to the ability for cells to regulate cellular metabolism, form long-lived  
endospores, enter a viable but nonculturable state (Oliver, 2005), and produce protective resting  
94 stages that are formed during facultative sexual reproduction (Evans and Dennehy, 2005).  
Dormancy has attracted attention in the clinical realm because it can help explain how pathogens  
96 tolerate high concentrations of antibiotics (i.e., persister cells; Lewis, 2010; Fisher et al., 2017).  
However, microbial dormancy is also prevalent in complex microbial communities ranging from  
98 the human gut to the world's oceans (Lennon & Jones, 2011). For example, > 90% of microbial  
biomass in soils is metabolically inactive (Alvarez et al., 1998; Lennon & Jones, 2011;  
100 Blagodatskaya & Kuzyakov, 2013).

Microorganisms can quickly transition between active and dormant states (Fig. 2; Walker  
102 & Winslow, 1932; Kaprelyants & Kell, 1993; Votyakova et al., 1994; Ishiguro et al., 2015).  
Although metabolic transition may occur stochastically (Epstein, 2009), dormancy is often  
104 regulated by environmental cues, such as changes in temperature (Oliver et al., 1995), pH  
(Keynan et al., 1964), water (Aadnerud et al., 2015), and resource supply (Dworkin & Shah,  
106 2010). The size and diversity of seed banks can also be affected by the mortality rate of  
individuals while they are in a dormant state. Some microorganisms succumb to environmental  
108 stress within days (Bale et al., 1993), while others can persist in a dormant state for prolonged  
periods of time. For example, viable microorganisms have been retrieved from ancient materials  
110 (e.g., permafrost, amber, halite crystals) that, in some cases, are hundreds of millions of years old  
(e.g., Johnson et al., 2007). As a consequence, dormant microorganisms can survive for periods  
112 of time that far exceed the average generation time of actively reproducing individuals (Cano &  
Borucki, 1995; Vreeland et al., 2000). Because a considerable fraction of phylogenetically  
114 diverse microbial taxa are able to enter a dormant state across disparate environments, it is likely

that dormancy has influenced the evolutionary history of microorganisms. Thus, the effects of  
116 dormancy have the potential to extend across evolutionary scales, ranging from the population  
genetic processes that underlie the evolutionary dynamics of populations to the rates that  
118 microbial lineages diverge and go extinct.

In this paper, we focus on how dormancy affects microbial evolution. We do this by  
120 synthesizing existing population genetic theory and developing novel simulations that provide  
insight into how seed banks affect the fundamental forces governing the rate and direction of  
122 evolution. We then examine how dormancy influences evolutionary dynamics on longer time  
scales, including macroevolutionary processes such as speciation and extinction. In addition, we  
124 examine environments where organisms are often found in a dormant state to determine whether  
dormancy is an evolutionarily viable bet-hedging strategy (Box 1). This distinction is important  
126 because some habitats may not improve on time scales that provide opportunities for  
reproduction, in which case, dormancy merely increases the amount of time it takes for a  
128 population to go extinct. Throughout this paper, we emphasize the importance of using  
population genetic theory to understand how dormancy as a life history strategy can alter  
130 evolutionary dynamics (Box 2). While we focus on dormancy and the evolution of microbial  
populations, the framework and conclusions should apply to organisms across the tree of life.

132

### **POPULATION GENETIC CONSEQUENCES OF DORMANCY**

134 Seed banks preserve genetic and phenotypic diversity by stratifying the population. In a  
population with a seed bank, there are active and dormant sub-populations, where individuals  
136 enter and exit a dormant state in a manner analogous to migration between sub-populations  
(Lennon & Jones, 2011; Blath et al., 2015) (Fig. 1). Seed banks are sometimes viewed simply as

138 an evolutionary buffer (Koopmann et al., 2016). Dormancy preserves existing genetic diversity  
by decreasing the rate that genetic diversity is removed from the population (Hairston & De  
140 Stasio, 1988; Vitalis et al., 2004; Koopmann et al., 2016), in-turn increasing in the effective size  
of the population (Nunney, 2002). However, when individuals remain dormant for extremely  
142 long periods of time, dormancy can have complex and non-intuitive effects on evolutionary  
dynamics (Blath et al., 2015). In the following sections, we use population genetic theory to  
144 examine how seed banks affect each of the fundamental forces of evolution and expand on that  
theory through the use of novel simulations.

146

*Genetic drift* — The amount of genetic diversity ( $\theta$ ) that can be maintained in an ideal  
148 population of finite size is determined by the number of individuals in the population ( $N$ ) and the  
per-generation mutation rate ( $\mu$ ). When the rate that genetic diversity acquired by mutation is  
150 equal to the rate that it is lost by drift (i.e., mutation-drift equilibrium), our expectation for the  
maximum amount of genetic diversity that can be maintained in an ideal population of haploid  
152 individuals is  $\theta = 2N\mu$ . This equation can conveniently be interpreted as the ratio of the rate that  
genetic diversity is acquired by mutation ( $2\mu$ ) and lost by drift ( $1/N$ ) each generation (Kimura,  
154 1969). However, our expectation needs to be modified when a population contains dormant  
individuals. Because dormant individuals do not reproduce and often have a greatly reduced  
156 death rate, genetic diversity turns over at a reduced rate relative to the active portion of the  
population, reducing the rate of genetic drift. By reducing the rate of genetic drift, seed banks  
158 should increase the maximum amount of genetic diversity that can be maintained in a finite  
population (Levin, 1990).

160 Two classes of theoretical population genetic models have been used to explore how  
genetic diversity scales with dormancy. The first class of models examines what is known as the  
162 weak seed-bank effect. The weak seed-bank effect assumes that the maximum number of  
generations that individuals can spend in an inactive state is smaller than the number of active  
164 individuals in the population. Thus, individuals can enter and exit the seed bank before the  
genetic diversity in the active portion of the population turns over due to the joint effects of  
166 mutation and drift (Kaj et al., 2001). The weak seed-bank model predicts that dormant  
individuals increase genetic diversity, but do not change the pattern of ancestry among  
168 individuals in the population (i.e., the shape of the population's genealogy). In contrast, the  
strong seed-bank model has no constraint on the maximum number of generations that an  
170 individual can remain in a dormant state (González-Casanova et al., 2014; Blath et al., 2015;  
2016). Removing this constraint in the mathematical model means that the length of time that an  
172 individual spends in the seed bank (where time is measured as generations) can be longer than  
the number of active individuals in the population. In other words, genetic diversity within the  
174 active portion of the population can turn over before a dormant individual is expected to exit the  
seed bank. Under this scenario genetic diversity within the active portion of the population  
176 effectively turns over before an individual in the seed bank has the opportunity to reproduce. The  
result of the strong seed-bank effect is that dormancy drastically alters the pattern of ancestry  
178 among individuals in the total population while increasing the maximum amount of genetic  
diversity that can be maintained in the population (Fig. 3a). With a strong seed-bank, the  
180 expected amount of pair-wise genetic diversity ( $E[\pi]$ ) in a population with  $M$  dormant  
individuals is  $E[\pi] = \theta + \theta\left(\frac{M}{N}\right)$ . This equation can be interpreted as the amount of genetic  
182 diversity expected in an ideal population with  $N$  actively reproducing individuals ( $\theta = 2N\mu$ ) plus



the seed bank's contribution towards reducing the rate of genetic drift scaled by the relative  
184 excess of dormant individuals ( $\frac{M}{N}$ ). However, it is important to point out that the strong seed-  
bank effect can require an extremely long period of time to take effect in large populations. For  
186 example, assuming a population of *E. coli* of size  $10^9$  that is only 10% active (i.e.,  $10^8$  cells), a  
strong seed-bank can only occur if on average dormant individuals spend approximately  $10^9$   
188 generations in a dormant state. Assuming an average growth rate of ~6.67 generations per day  
for active individuals (Tenailon et al., 2016), it would take ~410,000 years for the strong seed-  
190 bank to take effect. The length of time required is likely much smaller in real populations, as  
sub-optimal environmental conditions can reduce the total size of the population and potentially  
192 favor dormancy as an adaptive strategy.

In addition to increasing genetic diversity in a population, our simulations suggest that  
194 seed banks increase the average length of time required for a population to reach mutation-drift  
equilibrium (Fig. 3b). However, while the weak and strong seed-bank models present viable  
196 hypotheses about how dormancy can increase genetic diversity, little work has been done to  
determine if inferred patterns of ancestry in actual populations capable of entering a dormant  
198 state resemble predictions from the strong or weak seed-bank effect. Determining whether  
natural populations capable of entering a dormant state exhibit the strong or weak seed-bank  
200 effect will require comparing inferred patterns of ancestry to the predictions of each model.

202 **Mutation** — Mutations are the ultimate source of genetic diversity. In populations composed  
entirely of reproducing (i.e., active) individuals, the majority of newly acquired genetic variation  
204 is due to genome replication errors acquired during cell division (Kunkel, 2004). Given that  
dormant individuals do not reproduce, it is reasonable to expect that all observed genetic

206 diversity was acquired at some point in the past when the population was active, an assumption  
that is often made in population genetic models that include dormancy (Vitalis et al., 2004; Blath  
208 et al., 2015). However, mutations can still arise in populations that experience sub-optimal  
conditions. For example, the rate of mutation can effectively be decoupled from the rate of  
210 replication in *Mycobacterium tuberculosis* due to oxidative DNA damage that occurs when  
individuals spend a prolonged period of time in a dormant state (Ford et al., 2011; 2013). This  
212 reduced correlation between the rate of replication and the rate of mutation via oxidation-induced  
DNA damage likely applies to other types of mutagens (e.g., high intracellular concentrations of  
214 a chemical or physical mutagen). If acquiring mutations during dormancy is common among  
microorganisms, then it is necessary to consider the rate of mutation that occurs between  
216 replication events as well as the mutation rate during replication to understand how genetic  
diversity is acquired in populations.

218         The extent that mutation can be decoupled from replication may depend on the  
mechanisms regulating transitions into and out of dormancy. For example, DNA is protected  
220 during dormancy in endospore-forming taxa like *Bacillus* by the extremely low water content in  
the endospore coat and small, acid-soluble proteins that bind to the DNA (Setlow, 1992; 2006;  
222 Moeller et al., 2009; 2014), as well as the up-regulation of DNA repair during the early phases of  
resuscitation (Lenhart et al., 2012; Ramírez-Guadianaa et al., 2012). These mechanisms protect  
224 endospores from the loss of guanine due to depurination as well as UV radiation-induced  
pyrimidine dimers (Setlow, 1992), suggesting that environmentally induced mutagenesis occurs  
226 at a reduced rate in endospores. However, many taxa enter and exit dormancy without producing  
specialized resting structures (e.g., endospores, cysts, akinetes). As such, non-sporulating taxa  
228 may only rely on mismatch repair mechanisms that are upregulated during resuscitation (Mizrahi

& Anderson, 1998; Rittershaus et al., 2013) or DNA repair mechanisms that can be maintained  
230 under an energy-limited state (Gong et al., 2005; Dieser et al., 2013; Rittershaus, 2013). For non-  
endospore-forming taxa that spend extended periods of time in an energy-limited state it is likely  
232 that the long-term mutation rate is primarily determined by the fidelity of DNA repair  
mechanisms that operate during dormancy, rather than that of polymerases used during periods  
234 of rapid growth. Maintaining DNA repair may be a better mechanism for long-term cell survival  
rather than an absolute lack of metabolic activity. For example, evidence of DNA repair has been  
236 found in bacteria isolated from half-million-year-old permafrost samples (Johnson et al., 2007).  
While the exact cost of maintaining DNA repair mechanisms relative to the total energy budget  
238 of energy-limited cells is not known, it is small enough that it has been ignored when estimating  
the cost of cell maintenance under conditions of homeostasis (Lynch & Marinov, 2015) and  
240 extreme energy limitation (Kempes et al., 2017). These assumptions suggest that a certain level  
of mismatch repair can be maintained over long periods of dormancy without draining the total  
242 cellular budget.

Attempting to reproduce under sub-optimal conditions, rather than going dormant, can  
244 elevate the rate of mutation in a population. Microbial mutation rates tend to be higher under  
stressful conditions due to the upregulation of error-prone machinery used for DNA replication  
246 and repair (Witkin, 1976; Foster, 2007). Although controversial, it has been argued that this  
error-prone machinery may be adaptive under times of stress, as an increased mutation rate  
248 should increase the number of beneficial mutations acquired over a given length of time  
(Rosenberg, 2001; Foster, 2007; Galhardo et al., 2007). For example, it has been argued that  
250 DNA polymerases used under times of stress can confer a competitive advantage to starved  
populations of *Escherichia coli*, a phenomenon that has been dubbed Growth Advantage at

252 Stationary Phase (GASP) (Finkel, 2006). However, any temporary fitness advantage due to an  
upregulated mutation rate will have long-term consequences for the survival of the population.  
254 Because almost all mutations are deleterious (Lynch et al., 1999), any increase in the mutation  
rate will be accompanied by a proportional increase in the average number of deleterious  
256 mutations acquired per-individual per-generation, contributing towards the long-term  
deterioration of the genome (Gerrish et al., 2013; Lynch et al., 2016). The exact amount that  
258 fitness is reduced depends on the mutational distribution of fitness effects, which in-turn depends  
on the environment and the spectrum of mutations generated by the set of molecular machinery  
260 used for DNA replication and repair. For example, populations of *E. coli* upregulate DNA  
polymerase (Pol) IV under times of stress, a highly mutagenic polymerase that is capable of  
262 synthesizing DNA across lesions in the genome that would stop alternative polymerases (Ling et  
al., 2001). Under extreme stress, the ability to use an error-prone polymerase has a clear fitness  
264 advantage over death (McHenry, 2011; MacLean et al., 2013). However, alternative error-prone  
polymerases will almost certainly be accompanied by a proportional increase in the number of  
266 deleterious mutations acquired per unit time. The accumulation of deleterious mutations would  
result in a decrease in fitness once the environment improves, suggesting that populations that  
268 continue to grow under a starved state likely constitute an evolutionary dead end. Rather, if there  
is sufficient temporal variation in the environment then it is possible that the long-term geometric  
270 fitness of a population would be maximized by persisting in a dormant state rather than  
attempting to reproduce and incurring the negative effects of an elevated mutation rate.

272

**Selection** —A large body of theoretical and empirical research has focused on the evolutionary  
274 and ecological dynamics that emerge when dormancy is favored by selection (Hedrick, 1995;

Nunney, 2002; Malik & Smith, 2008; Ayati & Klapper, 2010). However, far less work has been  
276 done to understand how the ability to remain in a dormant state alters the ability for natural  
selection to act on a population. Because dormancy can act as a buffer against the stochastic  
278 forces of mutation and genetic drift, seed banks should reduce the rate that the directional force  
of natural selection removes genetic diversity from the population. Natural selection is less  
280 efficient in models that assume a weak seed-bank effect, where the average amount of time  
required for selection to drive a beneficial allele to fixation ( $T_{fix}$ ) accelerates quadratically with  
282 the average number of generations that an individual spends in a dormant state (Koopmann et al.,  
2016). However, little work has been done to examine selection under a strong seed-bank effect  
284 or how selection affects  $T_{fix}$  for active and dormant portions of the population. Intuitively, one  
might expect that  $T_{fix}$  would increase with the average number of generations that an individual  
286 spends in a dormant state, since individuals can spend an even longer period of time in a dormant  
state. Consequently, beneficial alleles should take longer to go to fixation because individuals  
288 must enter and exit the seed bank to spread the beneficial allele throughout the whole population.  
To test this hypothesis, we simulated the trajectory of a beneficial allele in a population subject  
290 to the strong seed-bank effect and examined the dormant and active portions of the population  
separately (see Supplemental Materials: Selection simulation). As expected, we found that the  
292 average amount of time required for a beneficial allele to reach fixation increases with the  
average number of generations that an individual spends in the seed bank (Fig. 4a, b)  
294 (Koopmann et al., 2016).

However, because any fitness advantage only increases the frequency of a beneficial  
296 allele if its carrier is reproducing, it is necessary to examine the active sub-population separately  
from the dormant sub-population. In our model, the beneficial allele initially rose in frequency

298 until it was effectively fixed (a.k.a., quasi-fixation), where it then fluctuated below a frequency  
of one as individuals continued to exit and enter the seed bank, in a fashion analogous to back-  
300 mutation in a single-locus model. By examining the active portion of a population with a seed  
bank in a simulation of selection on a single locus, we found that the average number of  
302 generations required for a beneficial allele to reach quasi-fixation is similar to that for the  
dormant portion up until the average time in the seed bank approaches the number of active  
304 individuals in the population (i.e., 1,000), the threshold between weak and strong seed-bank  
effects (Fig. 4b). Surprisingly, the average length of time until a beneficial allele is quasi-fixed  
306 among actively reproducing individuals decreases once the average number of generations in the  
seed bank exceeds the strong seed-bank threshold, approaching the expected  $T_{fix}$  for a  
308 population without a seed bank. This decrease in  $T_{fix}$  is likely because the input of genetic  
diversity via resuscitation is low enough that it does not increase the amount of time required for  
310 a beneficial allele to reach fixation, a result that to our knowledge has not previously been  
reported. Contrary to the expectation that  $T_{fix}$  increases with average time in the seed bank, our  
312 simulations suggest that under of a strong seed-bank effect, dormancy does not interfere with  
selection in the active portion of the population.

314 The decline of  $T_{fix}$  for the active portion of a population subject to the strong seed-bank  
effect has important implications for the long-term evolutionary dynamics of microbial  
316 populations. Because the majority of a given bacterial genome is likely clonal, the rate of  
evolution in a population undergoing adaptive evolution can be sufficiently described by the  
318 beneficial mutation rate ( $U$ ) and the strength of selection operating on a population of constant  
effective size ( $N$ ) (Desai et al., 2007). Given that the average time it takes for a beneficial  
320 mutation to arise ( $T_{mut}$ ) is much greater than  $T_{fix}$ , the population will evolve at a rate ( $v$ ), which

is proportional to the rate that beneficial mutations of small effect arise and fix within a  
322 population (i.e.,  $v \propto s^2 NU$ ) (Park et al., 2010). If this condition is violated, multiple beneficial  
mutations can arise on different genetic backgrounds and compete in the population, increasing  
324  $T_{fix}$  through the process of clonal interference (Gerrish & Lenski, 1998). As no one has  
examined clonal interference in an asexual population with a seed bank, there is no theory to  
326 draw on that would allow one to infer how dormancy would alter the rate of evolution in the  
multiple mutation regime. Our results suggest that the rate of evolution in the active portion of a  
328 microbial population with a strong seed-bank would not be pushed into the multiple mutation  
regime (Fig. 4b). However,  $T_{fix}$  will increase if the average individual spends fewer generations  
330 in a dormant state than the number of active individuals (Fig. 4b). If the presence of a seed bank  
increases  $T_{fix}$  to the point that it is not much larger than  $T_{mut}$ , then multiple beneficial mutations  
332 will segregate simultaneously, moving the population into the multiple mutations regime. To  
fully describe the dynamics of clonal interference in a population with a seed bank it will be  
334 necessary to extend the single beneficial mutation dynamics described here to the multiple  
mutation regime using simulations and population genetic theory.

336         The ability to enter a dormant state has important implications for adaptive evolution. If  
seed banks increase the amount of genetic diversity, then it should also maintain beneficial  
338 alleles that allow for the population to rapidly adapt to new environments. It is often argued that  
microbial populations harbor low levels of genetic diversity across their genomes due to the  
340 effects of rapid linked positive selection (i.e., genetic draft) (Smith & Haigh, 1974; Gillepsie,  
2000; Lynch, 2007). Under this scenario, the adaptive walk of a microbial population towards a  
342 fitness optimum consists of a series of origin-fixation steps (Orr, 2005), where one beneficial  
mutation goes to fixation before the next arises. Our simulations suggest that under a weak seed-

344 bank effect the length of an adaptive walk (measured in generations) should increase  
proportionately with the average number of generations that an individual spends in a seed bank.  
346 However, under a strong seed-bank effect, the average  $T_{fix}$  diverges for active and dormant  
individuals. This divergence suggests that the length of an adaptive walk will differ for active  
348 and dormant portions of the population, where the active portion of the population will reach the  
fitness peak in the same length of time as a population without a seed bank. All of these  
350 predictions assume that the adaptive walk consists of a series of sequential fixations of beneficial  
mutations. If multiple mutations segregate in the population at the same time, the length of the  
352 adaptive walk will increase. Whether dormancy increases or decreases the probability that the  
population is in the multiple mutation regime is a matter of ongoing research.

354

356 **Recombination** — Dormancy can also preserve the diversity in microbial populations that is  
generated by recombination. The ability for microorganisms to acquire and exchange DNA by  
358 horizontal gene transfer (HGT) is a major evolutionary feature that can promote the spread of  
beneficial genes within a population (Medini et al., 2005; Lapierre & Gogarten, 2009; Dixit et  
360 al., 2016). The stochastic processes of gene gain and loss via HGT leads to the uneven  
distribution of genes among genomes in a population (Berg & Kurland, 2002; Baumdicker et al.,  
362 2012). This uneven distribution is often summarized as the total number of genes found within  
the population (i.e., the pangenome) and the number of genes shared among all individuals  
364 within the population (i.e., the core genome). Similar to how the presence of a seed bank  
increases the maximum amount of genetic diversity that can be maintained in a finite population  
366 (Fig. 3), it is possible that it would also increase the size of the pangenome. In addition, a strong



seed-bank could alter the distribution of gene frequencies within a population, analogous to how  
368 the strong seed-bank effect alters the distribution of allele frequencies within a population (Blath  
et al., 2015). Thus, seed banks may alter the distribution of gene frequencies if inactive  
370 individuals are still capable of acquiring and incorporating foreign DNA into their genome.  
However, because the intake of DNA often requires the use of specific molecular systems (Chen  
372 & Dubnau, 2004; Mell & Redfield, 2014), the incorporation of foreign DNA into metabolically  
inactive cells is unlikely. Instead, it is more likely that the presence of a seed bank simply  
374 preserves genetic and genic diversity acquired by active individuals.

376  
**Gene flow** — Seed banks may affect microbial evolution by reducing the effect that migration  
378 has on allele frequencies within a population (i.e., gene flow). The ability to enter a dormant state  
can increase the chance that any two individuals share a common ancestor within a population  
380 (i.e., the probability of identity by descent) and reduce the amount of estimated differentiation  
among populations (i.e., the fixation index,  $F_{st}$ ) (Vitalis et al., 2004; Živković & Tellier, 2012;  
382 Hollander & Pederzani, 2017). While the effect of seed banks on the genetic similarity has been  
documented in plant populations (Tellier et al., 2011; Živković & Tellier, 2012), dormancy and  
384 migration are not always independent. For many organisms, dormancy can increase the  
probability of successfully migrating and establishing in a new population. For example, the  
386 spatial distribution of endospore-forming thermophilic bacteria in marine sediments closely  
reflects global ocean currents (Müller et al., 2014). However, dormancy and migration can  
388 represent a trade-off if the ability to enter a dormant state involves investing energy into a  
different mechanism than the one used to migrate (Olivieri, 2001). While this potential trade-off

390 is well known in life history theory, it is necessary to examine it in a population genetic context  
in order to understand how dormancy and migration interact to shape patterns of shared genetic  
392 diversity between populations.

394 -- *INSERT BOX 1 HERE* --

## 396 **MACROEVOLUTIONARY CONSEQUENCES OF DORMANCY**

In the previous section, we examined how seed banks influence the rate that allele  
398 frequencies change over relatively short periods of time within a lineage (i.e., microevolution).  
However, if seed banks buffer the aggregated effects of multiple evolutionary forces over long  
400 periods of time, then dormancy may have important implications for macroevolutionary  
phenomena. In the following section, we examine how dormancy influences macroevolutionary  
402 processes and patterns including the rate of molecular evolution, shared ancestry among lineages,  
speciation, and extinction.

404

*The rate of molecular evolution* — If dormancy can affect the rate of evolution in microbial  
406 populations, we would likely observe it in bacteria that are capable to persist for extended  
periods of time in an inactive state via their capacity to form resistant, long-lived endospores.  
408 Many bacteria in the phylum *Firmicutes* possess the ability to form endospores, which are  
thought to be one of the most metabolically inert forms of life on the planet (Setlow, 2014). Low  
410 resource availability initiates endospore formation inside the mother cell. When development is  
complete, the mother cell is lysed and the endospore is released into the environment. (Tan &  
412 Ramamurthi, 2013). Endospores are persistent and in some instances, have reportedly been

found to survive for hundreds of millions of years (Vreeland, 2000). Endospores can endure  
414 exposure to extreme conditions such as high doses of gamma and UV radiation (Nicholson et al.,  
2000; 2005), desiccation (Nicholson et al., 2000), and the vacuum of space (Horneck et al., 1994;  
416 2012). Given that endospore-forming bacteria can persist for long periods of time without  
reproducing, one might expect non-endospore-forming relatives to have more rapid rates of  
418 molecular evolution. This hypothesis was tested by analyzing a large collection of *Firmicutes*  
genomes, which included some isolates that had the ability to form endospores and other isolates  
420 that had lost the ability to form endospores (Weller & Wu, 2015). The rate of amino acid and  
synonymous substitutions for non-endospore forming isolates were significantly elevated relative  
422 to endospore-forming taxa and the phylogenetic branch length declined as the number of  
endospore-forming genes within a genome increased (Fig. 5a; Weller & Wu, 2015). These  
424 results suggest that rates of evolution increase when a lineage loses the ability to enter dormancy  
via sporulation. To further evaluate this effect of dormancy on the rate of evolution, we ran a  
426 simulation for the simple case of a neutrally evolving population, where we manipulated the  
average number of generations that an individual spends in the seed bank and calculated the  
428 substitution rate after 10,000 generations (see Supplementary Methods for more detail). For the  
entire population (i.e., both active and dormant individuals) we found that the rate of substitution  
430 declined as the average time in the seed bank increased, a finding that should apply to organisms  
across the tree of life irrespective of the mechanisms controlling transitions into and out of a  
432 dormant state (Fig. 5b).

While theoretical and empirical evidence suggests that seed banks can reduce the rate of  
434 evolution within a lineage, this effect may be short lived if the ability to enter and exit a dormant  
state cannot be maintained. For example, the ability to form endospores has been lost multiple

436 times within the *Firmicutes* phylogeny (Weller & Wu, 2015). The repeated loss of this seemingly  
beneficial trait across lineages can be explained by adaptive and non-adaptive evolutionary  
438 processes operating within a lineage. Organisms often need to invest in morphological or  
physiological structures to enter and exit a dormant state (Ayati & Klapper, 2012; Akiyama et  
440 al., 2017). The selective advantage dormancy must outweigh energetic costs as well as the fitness  
cost of not reproducing, where the strength and direction of natural selection can change over  
442 time (Simons, 2009). In relatively stable environments, the mechanism necessary to enter a  
dormant state may be lost from a lineage, either due to relaxed selection leading to the  
444 accumulation of mutations at dormancy-encoding loci or selection against the energetic cost of  
the mechanism (Dawes & Thornley, 1970). For example, in a long-term evolution experiment  
446 where five *Bacillus subtilis* populations were grown in culture medium that allowed for relaxed  
selection on endospore formation, all populations lost the ability to form endospores (Maughan  
448 et al., 2007). The accumulation of mutations due to relaxed selection was responsible for the loss  
of endospore formation in four of the five populations, while the loss of sporulation actually  
450 increased fitness in the remaining population. Endospore formation may be lost because it is a  
complex trait that is often encoded by more than 200 genes (Galperin et al., 2012), making it a  
452 large target for mutation. Alternatively, it is possible that the underlying genes may be lost  
because the energetic cost of even a single nucleotide is visible to natural selection in bacteria  
454 (Lynch & Marinov, 2015). In contrast to endospore-formation, other mechanisms regulating  
dormancy appear to require fewer genes than what is reported in endospore-forming bacteria. For  
456 example, resuscitation promoting factor (Rpf) is an extracellular enzyme encoded by a single  
gene that terminates dormancy for many bacteria belonging to the *Actinobacteria* phylum  
458 (Mukamolova et al., 1998; Keep et al., 2006). Rpf cleaves the 1,4-linkage between the amino

sugars N-acetylglucosamine and N-acetylmuramic acid in peptidoglycan, which are major  
460 constituents in the cell walls of all bacteria. The release of Rpf by an actively growing individual  
into the environment wakes up neighboring cells, resuscitating them from a dormant state. The  
462 gene encoding Rpf likely has a lower probability of being lost owing to its small size and  
relatively low energetic cost. However, because it is released outside of the cell it can potentially  
464 wake up neighboring cells from different lineages, increasing the amount of competition for  
newly available resources. Ultimately, whether a mechanism used to enter a dormant state is  
466 retained in a lineage long enough to affect the rate of evolution will depend on the amount of  
environmental variation the lineage experiences over extended periods of time, its effect on  
468 fitness, the mutation rate of the lineage, the number of nucleotides that encode the mechanism,  
and the effective size of the population.

470

*Shared ancestry among lineages* — Patterns of microbial genic ancestry can differ from patterns  
472 of species ancestry due to recombination (Degnan & Rosenberg, 2009). These dissimilar patterns  
of ancestry are often due to a few taxa harboring genes that have no detectable homologues in  
474 closely related lineages (i.e., ORFans) (Daubin & Ochman, 2004; Mira et al., 2004;  
Zhaxybayeva et al., 2009). A popular explanation for the existence of ORFans is horizontal  
476 gene transfer (HGT). HGT is a reasonable hypothesis given that genic and genomic content can  
vary among and within microbial lineages due to the exchange of genetic material (Ochman et  
478 al., 2000). However, certain ORFans are essential for the process of cell division and it is unclear  
to what extent essential genes can be lost and acquired without resulting in the death of the cell.  
480 To resolve this potential issue, the ability for microorganisms to remain in a dormant state for  
long periods of time has been proposed as an explanation for the existence of ORFans

482 (González-Casanova et al., 2014). If some fraction of individuals can remain dormant for  
extremely long periods of time (González-Casanova et al., 2014), then the active portion of the  
484 population may continue to accumulate substitutions to the point that certain genes in the active  
pool no longer share homology with members in the dormant pool. To test this, a set of ORFan  
486 genes from the nitrogen-fixing soil bacterium *Azotobacter vinelandii* and neighboring lineages  
were examined (González-Casanova et al., 2014). These ORFan genes had the characteristic  
488 codon-usage and GC-content biases of *A. vinelandii*, but showed little homology to closely  
related members of the genus *Pseudomonas*, a result that was interpreted as support for the  
490 strong seed-bank hypothesis.

While the strong seed-bank hypothesis may help explain the long-term evolutionary  
492 consequences of remaining in a dormant state, an alternative hypothesis can explain the existence  
of ORFans. As a first step, additional copies of essential genes could be acquired by HGT,  
494 leading to relaxed selection on each gene copy. The original copy could then be physically lost  
due to gene deletion or functionally lost due to accumulated mutations (Lynch, 2007). This new  
496 copy would then gradually acquire the same GC-content as the rest of the genes within the  
lineage through a combination of lineage-specific mutation spectrum biases and the rate of GC-  
498 biased gene conversion (Lynch, 2007; Lassalle et al., 2015). In addition, lineage-specific  
selection on translational efficiency would shape the codon composition of the gene (Drummond  
500 & Wilke 2008; Plotkin & Kudla, 2011), particularly if the lineage has a large effective  
population size (Sharp & Li, 1987; Sharp et al., 2005). These directional pressures suggest that  
502 horizontally acquired genes that are retained in the genome may lose their signal of homology  
while becoming similar in composition to vertically acquired genes, a more parsimonious  
504 explanation than the strong seed-bank effect. While the theoretical models necessary to describe

the effect of the seed bank on the genetic composition of microbial lineages exist (González-  
506 Casanova et al., 2014), further study is needed to determine whether the strong seed-bank effect  
applies to gene-specific patterns of ancestry.

508

*Speciation* — While a microbial species definition has yet to be widely adopted (Rosselló-Móraa  
510 & Amann, 2015), population genetic processes can be used to infer how dormancy may alter the  
rate that microbial lineages diverge. Population genetic theory suggests that the presence of a  
512 seed bank can preserve genetic similarity among separate populations (Vitalis et al., 2004). The  
ability to exit a dormant state effectively acts like gene flow in physically separated populations,  
514 preserving genetic diversity and similarity that might otherwise be lost due to selection acting on  
newly arisen alleles within a population. The preserved genetic similarity due to the seed bank  
516 would likely slow the rate of evolutionary divergence between spatially separated lineages,  
reducing the rate of allopatric speciation. However, if a portion of the population remains in a  
518 dormant state while the rest of the population diverges to the extent that genetic material can no  
longer be exchanged, then dormant and active individuals may ultimately diverge into separate  
520 lineages. This process of divergence is an extension of the strong seed-bank effect previously  
discussed (González-Casanova et al., 2014), where the focus is on how evolutionary divergence  
522 between dormant and active individuals can prevent the exchange of genetic material, rather than  
on patterns of ancestry. Seed banks should influence the rate of speciation, but very little is  
524 known about how microbial lineages split or the rate that they split, regardless of the microbial  
species definition. While the rates of speciation are unclear, recent research on the net difference  
526 of speciation and extinction rates (i.e., diversification) in microorganisms suggests that microbial  
taxa split at a constant rate through time (Marin et al., 2017). If so, then we would expect that

528 any decrease in the rate of speciation due to the presence of a seed bank would be associated  
with a similar increase in the rate of extinction, or vice-versa. The exact evolutionary  
530 mechanisms that are responsible for this constant rate of lineage diversification are currently  
unknown. Determining to what extent the ability to persist in a dormant state can alter the rate of  
532 speciation requires further research.

534 -- *INSERT BOX 2 HERE* --

536 ***Extinction*** — Because seed banks can reduce the average death rate in a population, they can  
likely buffer populations from extinction (Kalisz & McPeck, 1993). However, while next to  
538 nothing is known about extinction rates in microorganisms (Weinbauer & Rassoulzadegan,  
2007), we can extend evolutionary models to examine how the ability to enter a dormant state  
540 might alter the rate of extinction. While ecological and environmental factors certainly contribute  
to the rate of extinction, we will focus on how evolutionary dynamics alter the probability of  
542 extinction for a microbial population. Because a large portion of bacterial genomes are thought  
to be clonal (Bobay et al., 2015) it has been argued that the rate of extinction in a microbial  
544 lineage is determined by the fixation rate of deleterious mutations; a process known as Muller's  
Ratchet (Muller, 1964; Felsenstein, 1974). Once a deleterious mutation is fixed in a clonal  
546 population, it can only be removed by the fixation of a reverse mutation at the same site or  
compensated by the simultaneous acquisition and fixation of a high fitness mutation (i.e.,  
548 stochastic tunneling; Iwasa et al., 2004). The negative fitness effect of deleterious substitutions  
accumulated over time can reduce reproductive output, leading to a positive feedback where  
550 deleterious mutations continue to accumulate and reproductive output further declines over time.



This feedback loop eventually results in the extinction of the lineage, a phenomenon known as a  
552 mutational meltdown (Gabriel et al., 1993; Lynch et al., 1993). Because lineages persisting in a  
dormant state likely fix mutations at a far lower rate and have a lower rate of evolution (Fig. 5),  
554 extinction via mutational meltdown is less likely to occur within lineages capable of forming a  
seed bank. Given that dormant individuals can persist on time scales upwards of millions of  
556 years (Cano et al., 1995; Greenblatt et al., 2004), it is worth investigating whether there is a  
relationship between the age of a microbial lineage and its ability to persist in a dormant state.

558 Analytical and conceptual models of microbial extinction have historically focused on  
clonal evolutionary dynamics. However, it is increasingly clear that microbes regularly exchange  
560 segments of DNA within and between lineages via HGT (Smith et al., 1993; Shapiro, 2016) and  
that the rate that DNA is exchanged between lineages can alter the rate of microbial  
562 diversification (Rayssiguier, et al., 1989; Dykhuizen & Green 1991; Fraser et al., 2007;  
Doroghazi & Buckley, 2014; Dixit et al., 2016; Martinen & Hanage, 2017). The ability for a  
564 microorganisms to acquire and incorporate foreign DNA into their genomes suggests that fixed  
deleterious alleles can be purged from a population, alleviating the effects of Muller's ratchet  
566 and mutational meltdown. This evolutionary scenario has been incorporated into analytical  
population genetic models, where populations capable of incorporating foreign DNA (whether  
568 from a donor cell or the environment) are effectively immune to Muller's ratchet (Takeuchi et  
al., 2014). These results suggest that it is necessary for realistic models of microbial extinction to  
570 incorporate the per-base rate of recombination. However, even with an extremely high rate of  
recombination, we would still expect that the ability to enter a dormant state would reduce the  
572 probability of a lineage going extinct. Both HGT and dormancy can likely extend the lifespan of  
a microbial lineage in a fluctuating environment.

574

## CONCLUSION

576           The ability to enter a dormant state is a common life history strategy that is found across  
the tree of life. Historically dormancy has been viewed as an adaptive trait that preserves genetic  
578 and taxonomic diversity, with comparatively little attention given to its effects on the  
fundamental forces that underlie evolution. Using recent developments in theoretical population  
580 genetics and novel simulations we examined how the ability to enter a dormant state effects the  
population genetic forces that underlie evolutionary biology as well as common estimates of  
582 genetic diversity. Specifically, we identified the demographic scenarios where dormancy can  
affect natural selection. We then extended these results to determine how dormancy can  
584 influence the evolutionary dynamics of microbial lineages and in what environmental systems  
the ability to enter a dormant state is a viable life history strategy. We conclude that while  
586 dormancy can influence evolutionary dynamics and common estimates of genetic diversity, it is  
necessary to consider whether dormant organisms within a system are engaging in a life history  
588 strategy or simply reducing their level of metabolic activity out of physiological necessity. Other  
important, but yet unresolved questions include: 1) can dormancy push microbial populations  
590 into the multiple mutation regime, 2) how does dormancy as an environmentally dependent  
adaptive trait alter evolutionary dynamics and the process of adaptation, and 3) how has  
592 dormancy altered the rate of molecular evolution across the microbial tree of life. By considering  
the short-term population genetic and long-term macroevolutionary implications of dormancy as  
594 an adaptive trait, we can understand the extent that dormancy has impacted the evolutionary  
dynamics of the most abundant and metabolically diverse group of organisms on the planet.  
596 Determining the extent that dormancy influences microbial evolution will require empirical

research on whether dormant microorganisms in the environment are engaging in a life history  
598 strategy as well as continued development of the population genetic theory that accounts for the  
evolutionary effects of dormancy.

600

602

604

606

608

610

612

614

616

618

## 620 **Box 1: Dormancy in low-energy environments**

622 More than 50% of all prokaryotic (i.e., Bacteria and Archaea) cells in the oceans live  
624 underneath continents and on the sediment floor in a subsurface habitat known as the “deep  
626 biosphere” (Kallmeyer et al., 2012; Parkes et al., 2014). There, microorganisms are fueled by  
628 remnants of organic matter produced in the well-lit and productive surface waters that sink to the  
630 bottom of the ocean. As a result, the energy-limited microorganisms in the deep biosphere rest  
632 on the thermodynamic edge of life and death (Kallmeyer et al., 2012; Parkes et al., 2014;  
634 Jørgensen & Marshall, 2016; Starnawski et al., 2017). Because metabolic activity is extremely  
636 low and endospores are as abundant as vegetative cells, the deep biosphere likely constitutes the  
638 largest seed bank on the planet (Lomstein et al., 2012). Based on rates of amino acid  
640 racemization, it is estimated that the microbial biomass pool may only turnover once every  
642 thousand years, suggesting that populations within the deep biosphere are evolutionarily static  
(Lomstein et al., 2012; Hoehler & Jørgensen, 2013; Jørgensen & Marshall, 2016). Metagenomic  
and single-cell sequencing has revealed extremely low levels of genetic divergence for lineages  
within the deep biosphere (Starnawski, 2017). In addition, the ratio of synonymous to non-  
synonymous polymorphisms did not change with sediment depth for three out of four lineages,  
suggesting that populations within the deep biosphere are not adapting to their environment  
(Starnawski et al., 2017). These findings are consistent with the expectation that dormancy acts  
as an evolutionary buffer. However, the slow turnover rate raises the question of whether  
dormancy is a viable life history strategy in the deep biosphere. Without a change in  
environmental conditions that would occasionally favor growth and reproduction, the deep  
biosphere may simply reflect a very large collection of microorganisms that are on a slow march  
to death.

In contrast, dormancy is likely a viable life history strategy in certain regions of the  
644 permafrost, a temperature and energy-limited environment covering 25% of Earth's terrestrial  
surface (Graham et al., 2012). Upper layers of the permafrost that are not covered with ice can go  
646 through annual freeze-thaw cycles, providing the temporal variation necessary to favor dormancy  
as a life history strategy (Cohen, 1966; Malik & Smith, 2008). These freeze-thaw cycles could  
648 produce boom-and-bust periods of population growth that would leave a generation-time effect  
on the rate of molecular evolution, where lineages closer to the poles spend more time on  
650 average in a dormant state and show a reduced rate of molecular evolution. If so, this might  
result in latitudinal patterns of diversification, a long-standing pattern of diversity in a range of  
652 biological systems (Willig et al. 2003; Mittelbach et al. 2007). However, many microorganisms  
within the permafrost may not be completely dormant. For example, psychrophilic taxa isolated  
654 from the permafrost are capable of genome replication at temperatures as low as -20 °C (Tuorto  
et al., 2014) and evidence of DNA repair has been found in taxa that have persisted in the  
656 permafrost for hundreds of thousands to millions of years (Johnson et al., 2007; Dieser et al.,  
2013). This does not suggest that there are no dormant microorganisms within the permafrost, as  
658 the generation-time effect can still occur if growth rate is correlated with season and the  
energetic cost of DNA repair is thought to be negligible (see *Mutation* section). However, as  
660 average global temperature increases due to human-induced climate change, seasonal  
fluctuations below the freezing point of water will likely be less common. This rapid directional  
662 shift in the permafrost away from freeze-thaw cycles will likely impose a strong selective  
pressure against dormancy as a life history strategy, instead favoring sustained growth and  
664 reproduction.

666

## **Box 2: Dormancy and the evolution of infectious diseases**

668 The persistence and spread of pathogens requires that microorganisms contend with  
environmental variation inside and outside of their hosts. A host's immune system represents a  
670 major challenge for pathogen survival. As a consequence, pathogens often exhibit periods of  
rapid growth during the early stages of infection, but slower growth in the later stages of  
672 infection and when individuals disperse outside of the host environment (Oliver et al., 1995).  
These temporal fluctuations in growth conditions suggest that the ability to enter a dormant state  
674 could be favored by selection. For example, *Yersinia pestis*, the causative agent of the plague,  
often enters a dormant stage that allows it to persist between infections (Pawlowski et al., 2011).  
676 In addition, *Y. pestis* contains several highly conserved genes that can contribute towards its  
ability to survive in a dormant state long after the host has expired (Easterday et al., 2012).  
678 Because the pathogen is capable of infecting a new host, any trade-off between virulence and  
transmission could potentially be reduced. If dormancy is as common among pathogens as it is in  
680 *Y. pestis*, then the ability to enter and exit a dormant state likely affects the evolutionary  
dynamics of pathogenic microorganisms.

682

Dormancy may also contribute to the evolution of antibiotic resistant pathogens. The  
684 evolution of disease-causing bacteria that are resistant to commonly used antibiotics is a major  
global health care concern (WHO, 2014). For example, methicillin-resistant *Staphylococcus*  
686 *aureus* infections alone are responsible for killing more than 11,000 US citizens each year  
(Gross, 2013; Golkar et al., 2014). By 2050, it is estimated that antibiotic resistant infections will  
688 have killed 10 million people (O'Neill, 2014). Because many antibiotics target molecular

mechanisms that are primarily used during periods of growth, dormant cells are able of surviving  
690 antibiotic treatment, contributing towards the length and severity of antibiotic resistant infections  
(Wood et al., 2013; Zhang, 2014). Natural selection can optimize the length of time that bacteria  
692 remain dormant under antibiotic treatment (Fridman et al., 2014). In addition to preventing cell  
death, bacteria that survive antibiotic treatment by entering a dormant state are likely to evolve  
694 antibiotic resistance simply because they survive long enough to acquire a beneficial mutation  
(Levin-Reisman et al., 2017). To combat antibiotic resistant infections, it will be necessary to  
696 develop treatments and strategies to remove reservoirs of dormant bacteria. One potential  
strategy for targeting pathogens while minimizing the risk of antibiotic resistance is to resuscitate  
698 dormant cells alongside a course of antibiotics. The development of treatments designed to  
resuscitate dormant pathogenic bacteria is in the early stages, but holds promise. For example,  
700 commonly used clinical procedures were only able to detect *Mycobacterium tuberculosis* in  
sputum samples of infected individuals after cells were resuscitated with a dormancy-terminating  
702 extracellular enzyme, the resuscitating promoting factor (RPF; Mukamolova et al., 2010).  
However, because a large fraction of infections are acquired in hospitals (Klevens et al., 2007), it  
704 will be necessary to develop strategies to remove dormant disease-causing bacteria in buildings  
(i.e., the built environment) as well as in infected hosts. Recent work on characterizing the built  
706 environment suggests that the ability to persist shapes the composition of indoor microbial  
communities (Gibbons et al., 2015; Gibbons, 2016), a trait found in many disease-causing  
708 bacteria. Combating the emergence of antibiotic resistant bacteria and the role of dormancy as an  
adaptive trait will require re-examining the architecture and materials used to construct the  
710 buildings where infection is treated as well as infection treatment itself.

712

## ACKNOWLEDGMENTS

We acknowledge MG Behringer, J Davis, V Kuo, KJ Locey, RW Moger-Reischer, and  
714 NI Wisnoski for feedback on earlier versions of the manuscript. BK Lehmkuhl and E Polezhaeva  
provided technical assistance. This work was supported by National Science Foundation  
716 Dimensions of Biodiversity Grant 1442246 (JTL) and US Army Research Office Grant  
W911NF-14-1-0411 (JTL).

718

## DATA ARCHIVING STATEMENT

720 The data and code for the simulations used in this study can be found in a public GitHub  
repository (<https://github.com/LennonLab/EvoDorm>).

722

## AUTHOR CONTRIBUTIONS

724 WRS and JTL conceived of the ideas for the paper; WRS created and executed the  
simulations; WRS and JTL wrote the paper.

726

728

730

732

734



## REFERENCES

- 736 Aanderud, Z. T., Jones, S. E., Fierer, N., & Lennon, J. T. (2015). Resuscitation of the rare  
biosphere contributes to pulses of ecosystem activity. *Frontiers in Microbiology*, 6, 1–11.
- 738 Akiyama, T., Williamson, K. S., Schaefer, R., Pratt, S., Chang, C. B., & Franklin, M. J.  
(2017). Resuscitation of *Pseudomonas aeruginosa* from dormancy requires hibernation  
740 promoting factor (PA4463) for ribosome preservation. *Proceedings of the National  
Academy of Sciences, USA* 114, 3204–3209.
- 742 Alvarez, C. R., Alvarez. R., Grigera, S., Lavado. R. S. (1998). Associations between organic  
matter fractions and the active soil microbial biomass. *Soil Biology. Biochemistry*, 30,  
744 767–773.
- Ayati, B.P., & Klapper, I. (2012). Models of microbial dormancy in biofilms and  
746 planktonic cultures. *Communications in Mathematical Sciences*, 10, 493–511
- Bale, M. J., Bennett, P. M., Beringer, J. E., and Hinton, M. (1993). The survival of bacteria  
748 exposed to desiccation on surfaces associated with farm buildings. *Journal of Applied  
Bacteriology*, 75, 519-528.
- 750 Baumdicker, F., Hess, H. R., & Pfaffelhuber, P. (2012). The Infinitely Many Genes  
Model for the Distributed Genome of Bacteria. *Genome Biology and Evolution*, 4, 443–  
752 456.
- Bazzaz, F. A. (1979). Physiological ecology of plant succession. *Annual Review of Ecology,  
754 Evolution, and Systematics*, 10, 351–371.
- Berg, O. G., & Kurland., C. G. (2002). Evolution of Microbial Genomes: Sequence  
756 Acquisition and Loss. *Molecular Biology and Evolution*, 19, 2265–2276.
- Blagodatskaya, E., & Kuzyakov, Y. (2013). Active microorganisms in soil: critical review of

- 758 estimation criteria and approaches. *Soil Biology Biochemistry*, 67, 192–211.
- Blath, J., González-Casanova, A., Eldon, B., Kurt, N., & Wilke-Berenguer, M. (2015).  
760 Genetic Variability Under the Seedbank Coalescent. *Genetics*, 200, 921–934.
- Blath, J., González-Casanova, A., Kurt, N., & Wilke-Berenguer, M. (2016). A new  
762 coalescent for seed-bank models. *Annals of Applied Probability*, 26, 857-891
- Bobay, L., Traverse, C. C., & Ochman, H. (2015). Impermanence of bacterial clones.  
764 *Proceedings of the National Academy of Sciences, USA*, 112, 8893–8900.
- Bradshaw, W. E., Armbruster, P. A., & Holzapfel, C. M. (1998). Fitness consequences of  
766 hibernal diapause in the pitcher-plant mosquito, *Wyeomyia smithii*. *Ecology*, 79, 1458–  
1462.
- 768 Brown, J. S., & Venable, D. L. (1986). Evolutionary ecology of seed-bank annuals in  
temporally varying environments. *The American Naturalist*, 127, 31–47.
- 770 Buoro, M., & Carlson, S. M. (2014). Life-history syndromes: integrating dispersal through space  
and time. *Ecology Letters*, 17, 756–767.
- 772 Cáceres, C. E., & Tessier, A. J. (2004). To sink or swim: Variable diapause strategies  
among *Daphnia* species. *Limnology and Oceanography*, 49, 1333–1340.
- 774 Cano, R. J., & Borucki, M. K. (1995). Revival and identification of bacterial spores in  
25- to 40-million-year-old Dominican amber. *Science*, 268, 1060-1064.
- 776 Chen, I., & Dubnau, D. (2004). DNA uptake during bacterial transformation. *Nature Reviews*  
*Microbiology*, 2, 241-249.
- 778 Chesson, P. (1994). Multispecies competition in variable environments. *Theoretical*  
*population biology*, 45, 227–276.
- 780 Chesson, P. L., & Warner, R. R. (1981). Environmental variability promotes coexistence

in lottery competitive systems. *The American Naturalist*, 117, 923–943.

- 782 Cohen, D. (1966). Optimizing reproduction in a randomly varying environment. *Journal*  
of *Theoretical Biology*, 12, 119–129.
- 784 Dawes, I. W., & Thornley, J. H. M. (1970). Sporulation in *Bacillus subtilis*. Theoretical  
and experimental studies in continuous culture systems. *Journal of General*  
786 *Microbiology*, 62, 49–66.
- Daubin, V., & Ochman, H. (2004). Bacterial genomes as new gene homes: The genealogy of  
788 ORFans in *E. coli*. *Genome Research*, 14, 1036–1042.
- de Casas, R. R., Donohue, K., Venable, D. L., & Cheptou, P. (2015). Gene-flow through  
790 space and time: dispersal, dormancy and adaptation to changing environments.  
*Evolutionary Ecology*, 29, 813–831.
- 792 Degnan, J. H., & Rosenberg, N. A. (2009). Gene tree discordance, phylogenetic inference and  
the multispecies coalescent. *Trends in Ecology & Evolution*, 24, 332–340.
- 794 Desai, M. M., Fisher, D. S., & Murray, A. W. (2007). The speed of evolution and  
maintenance of variation in asexual populations. *Current Biology*, 17, 385–394.
- 796 Dieser, M., Battista, J. E., & Christner, B. C. (2013). DNA double-strand break repair at –  
15 C. *Applied and Environmental Microbiology*, 79, 7662–7668.
- 798 Dixit, P., Pang, T. Y., & Maslov, S. (2016). Recombination-Driven Genome Evolution and  
Stability of Bacterial Species. *Genetics*, 207, 281–295.
- 800 Doroghazi, J. R., & Buckley, D. H. (2014). Intraspecies comparison of *Streptomyces pratensis*  
genomes reveals high levels of recombination and gene conservation between strains of  
802 disparate geographic origin. *BMC Genomics*, 15, 970
- Drummond, D. A., & Wilke, C. O. (2008). Mistranslation-induced protein misfolding as a

- 804 dominant constraint on coding-sequence evolution. *Cell*, 134, 341-352.
- Dworkin, J. & Shah, I. M. (2010). Exit from dormancy in microbial organisms. *Nature Reviews*
- 806 *Microbiology*, 8, 890–896.
- Dykhuisen, D. E., Green, L. (1991). Recombination in *Escherichia coli* and the definition of
- 808 biological species. *Journal of Bacteriology*, 173, 7257–7268.
- Easterday, W. R., Kausrud, K. L., Star, B., Heier, L., Haley, B. J., Ageyev, V., ...
- 810 Stenseth, N. C. (2012). An additional step in the transmission of *Yersinia pestis*? *The*  
*ISME Journal*, 6, 231–236.
- 812 Epstein, S. S. (2009). Microbial awakenings. *Nature*, 457, 1083–1083.
- Eriksson, A., Fernstrom, P., Mehlig, B., & Sagitov, S. (2008). An Accurate Model for
- 814 Genetic Hitchhiking. *Genetics*, 178, 439–451.
- Evans, M. E., & Dennehy, J. J. (2005). Germ banking: bet-hedging and variable release from egg
- 816 and seed dormancy. *The Quarterly Review of Biology*, 80, 431-451.
- Felsenstein, J. (1974). The evolutionary advantage of recombination. *Genetics*, 78, 737–
- 818 756.
- Finkel, S. E. (2006). Long-term survival during stationary phase: evolution and the GASP
- 820 phenotype. *Nature Reviews Microbiology*, 4, 113-120.
- Fisher, R. A., Gollan, B., & Helaine, S. (2017). Persistent bacterial infections and persister cells.
- 822 *Nature Reviews Microbiology*, 15, 453–464
- Ford, C. B., Shah, R. R., Maeda, M. K., Gagneux, S., Murray, M.B., Cohen, T., ...
- 824 Fortune, S. M. (2013). *Mycobacterium tuberculosis* mutation rate estimates from  
different lineages predict substantial differences in the emergence of drug-resistant
- 826 tuberculosis. *Nature Genetics*, 45, 784–790.

- Ford, C. B., Lin, P. L., Chase, M. R., Shah, R. R., Iartchouk, O., Galagan, J., ... Fortune,  
828 S. M. (2011). Use of whole genome sequencing to estimate the mutation rate of  
*Mycobacterium tuberculosis* during latent infection. *Nature Genetics*, 43, 482–486.
- 830 Foster, P. L. (2007). Stress-induced mutagenesis in bacteria. *Critical Reviews in*  
*Biochemistry and Molecular Biology*, 42, 373-397.
- 832 Fraser, C., Hanage, W. P., & Spratt, B. G. (2007). Recombination and the nature of bacterial  
speciation. *Science* 315, 476–480.
- 834 Fridman, O., Goldberg, A., Ronin, I., Shores, N., Balaban, N. Q. (2014). Optimization of lag  
time underlies antibiotic tolerance in evolved bacterial populations. *Nature*, 513, 418–  
836 421.
- Gabriel, W., Lynch, M., & Burger, R. (1993). Muller’s Ratchet and mutational  
838 meltdowns. *Evolution*, 47, 1744-1757.
- Galhardo R. S., Hastings, P. J., & Rosenberg, S. M. (2007). Mutation as a stress response  
840 and the regulation of evolvability. *Critical Reviews in Biochemistry and*  
*Molecular Biology*, 42, 399-435.
- 842 Galperin, M. Y., Mekhedov, S. L., Puigbo, P., Smirnov, S., Wolf, Y. I., & Rigden, D. J.  
(2012). Genomic determinants of sporulation in *Bacilli* and *Clostridia*: towards the  
844 minimal set of sporulation-specific genes. *Environmental Microbiology*, 14, 2870–2890.
- GBD 2015 Mortality and Causes of Death Collaborators (2016). Global, regional, and national  
846 life expectancy, all-cause mortality, and cause-specific mortality for 249 causes of death,  
1980-2015: a systematic analysis for the Global Burden of Disease Study 2015. *Lancet*,  
848 388, 1459–1544.
- Gerrish, P. J., Colato, A. & Sniegowski, P. D. (2013). Genomic mutation rates that

- 850 neutralize adaptive evolution and natural selection. *Journal of The Royal Society*  
852 *Interface*, 10, 20130329.
- 852 Gerrish, P. J., & Lenski, R. E. (1998). The fate of competing beneficial mutations in an  
854 asexual population. *Genetica*, 102/103, 127–144.
- 854 Gibbons, S. M. (2016). The built environment is a microbial wasteland. *mSystems*, 1,  
e00033-16.
- 856 Gibbons S. M., Schwartz, T., Fouquier, J., Mitchell, M., Sangwan, N., Gilbert, J. A., &  
858 Kelley, S. T. (2015). Ecological succession and viability of human-associated  
858 microbiota on restroom surfaces. *Applied Environmental Microbiology*, 81, 765–  
773.
- 860 Gillespie, J. H. (2000). Genetic drift in an infinite population. The pseudohitchhiking  
862 model. *Genetics*, 155, 909-919.
- 862 Golkar Z, Bagazra, O., Pace, D. G. (2014). Bacteriophage therapy: a potential solution for the  
864 antibiotic resistance crisis. *Journal of infection in developing countries*, 8, 129–136.
- 864 Gong, C., Bongiorno, P., Martins, A., Stephanou, N. C., Zhu, H., Shuman, S., &  
866 Glickman, M. S. (2005). Mechanism of nonhomologous end-joining in mycobacteria: a  
866 low-fidelity repair system driven by Ku, ligase D and ligase C. *Nature Structural &*  
*Molecular Biology*, 12, 304–312.
- 868 González-Casanova, A., Aguirre-von-Wobeser, E., Espín, G., Servín-González, L., Kurt,  
870 N., Spanò, D., Blath, J., & Soberón-Chávez, G. (2014). Strong seed-bank effects  
870 in bacterial evolution. *Journal of Theoretical Biology*, 356, 62–70.
- 872 Graham, D. E., Wallenstein, W. D., Vishnivetskaya, T. A., Waldrop, M. P., Phelps, T. J.,  
872 Pfiffner, S. M., ... Jansson, J. K. (2012). Microbes in thawing permafrost: the

- unknown variable in the climate change equation. *The ISME Journal*, 6, 709–712.
- 874 Greenblatt, C. L., Baum, J., Klein, B. Y., Nachshon, S., Koltunov, V., & Cano, R. J.  
(2004). *Micrococcus luteus* - Survival in amber. *Microbial Ecology*, 48, 120-127.
- 876 Gross, M. (2013). Antibiotics in crisis. *Current Biology*, 23, 1063–1065.
- Guppy, M., & Withers, P. (1999). Metabolic depression in animals: physiological  
878 perspectives and biochemical generalizations. *Biological reviews of the  
Cambridge Philosophical Society*, 74, 1–40.
- 880 Hairston Jr., N. G. & De Stasio Jr., B. T. (1988). Rate of evolution slowed by a dormant  
propagule pool. *Nature*, 336, 239–242.
- 882 Hairston, N. G., Lampert, W., Cáceres, C. E., Holtmeier, C. L., Weider, L. J., Gaedke, U.,  
Fischer, J. M. ... Post, D. M. (1999). Lake ecosystems: Rapid evolution revealed by  
884 dormant eggs. *Nature*, 401, 446–446.
- Hedrick, P. W. (1995). Genetic polymorphism in a temporally varying environment: effects of  
886 delayed germination or diapause. *Heredity*, 75, 164–170;
- Hoehler, T. M., & Jørgensen, B. B. (2013). Microbial life under extreme energy  
888 limitation. *Nature Reviews Microbiology*, 11, 83–94.
- Hollander, F. den., & Pederzani, G. (2017). Multi-colony Wright-Fisher with seed-bank.  
890 *Indagationes Mathematicae*, doi:10.1016/j.indag.2017.02.002
- Horneck, G., Bucker, H., & Reitz, G. (1994). Long-term survival of bacterial spores in  
892 space. *Advances in Space Research*, 14, 41–45.
- Horneck, G., Moeller, R., Cadet, J., Douki, T., Mancinelli, R. L., Nicholson, W. L., ...  
894 Venkateswaran, K. J. (2012). Resistance of bacterial endospores to outer space for  
planetary protection purposes—Experiment PROTECT of the EXPOSE-E

- 896 mission. *Astrobiology*, 12, 445–456.
- Ishiguro, K., Washio, J., Sasaki, K., & Takahashi, N. (2015). Real-time monitoring of the  
898 metabolic activity of periodontopathic bacteria. *Journal of Microbiological Methods*,  
115, 22–26.
- 900 Iwasa, Y., Michor, F., & Nowak, M. A. (2004). Stochastic tunnels in evolutionary dynamics.  
*Genetics*, 166, 1571–1579
- 902 Johnson, S. S., Hebsgaard, M. B., Christensen, T. R., Mastepanov, M., Nielsen, R.,  
K., Brand, T., ... Willerslev, E. (2007). Ancient bacteria show evidence of DNA  
904 repair. *Proceedings of the National Academy of Sciences, USA*, 104, 4401-14405.
- Jones, S. E. & Lennon, J. T. (2010). Dormancy contributes to the maintenance of  
906 microbial diversity. *Proceedings of the National Academy of Sciences, USA*, 107,  
5881–5886.
- 908 Jørgensen, B. B. (2012). Shrinking majority of the deep biosphere. *Proceedings of the  
National Academy of Sciences, USA*, 109, 15976–15977.
- 910 Jørgensen, B. B., & Marshall, I. P. G. (2016). Slow Microbial Life in the Seabed. *Annual  
Review of Marine Science*, 8:311–332.
- 912 Kaj, I., Krone, S. M., & Lascoux, M. (2001). Coalescent theory for seed bank models.  
*Journal of Applied Probability*, 38, 285–300.
- 914 Kalamees, R. & Zobel, M. (2002). The role of the seed bank in gap regeneration in a calcareous  
grassland community. *Ecology*, 83, 1017–1025.
- 916 Kalisz, S. & McPeck, M. A. (1993). Extinction dynamics, population growth and seed banks.  
*Oecologia*, 95, 314-320.
- 918 Kallmeyer, J., Pockalny, R., Adhikari, R. R., Smith, D. C. & D'Hondt, S. (2012). Global



- distribution of microbial abundance and biomass in subseafloor sediment.
- 920 *Proceedings of the National Academy of Sciences, USA*, 109, 16213–16216.
- Kaprelyants, A. S., & Kell, D. B. (1993). Dormancy in Stationary-Phase Cultures of
- 922 *Micrococcus luteus*: Flow Cytometric Analysis of Starvation and Resuscitation. *Applied*  
*and Environmental Microbiology*, 59, 3187–96.
- 924 Keep, N. H., Ward, J. M., Cohen-Gonsaud, M., & Henderson, B. (2006). Wake up!  
Peptidoglycan lysis and bacterial non-growth states. *Trends in Microbiology*, 14, 271–
- 926 276.
- Kempes, C. P., van Bodegom, P. M., Wolpert, D., Libby, E., Amend, J., & Hoehler, T.
- 928 (2017). Drivers of Bacterial Maintenance and Minimal Energy Requirements.  
*Frontiers in Microbiology*, 8, 1–10.
- 930 Keynan, A., Evanchik, Z., Halvorson, H. O., & Hastings, J. W. (1964). Activation of bacterial  
endospores. *Journal of Bacteriology*, 88, 313–8.
- 932 Kimura, M. (1969). The number of heterozygous nucleotide sites maintained in a finite  
population due to steady flux of mutations *Genetics*, 61, 893-903.
- 934 Klevens, R. M., Edwards, J. R., Richards Jr., C. L., Horan, T. C., Gaynes, R. P., Pollock, D. A.,  
& Cardo, D. M. (2007). Estimating health care-associated infections and deaths in U.S.
- 936 hospitals, 2002. *Public Health Reports*, 122, 160–166.
- Koopmann, B., Müller, J., Tellier, A., & Živković, D. (2017). Fisher–Wright model with
- 938 deterministic seed bank and selection. *Theoretical Population Biology*, 114, 29–39.
- Kunkel, T. A. (2004). DNA replication fidelity. *The Journal of Biological Chemistry*,
- 940 279, 16895–16898.
- Lapierre, P., & Gogarten, J. P. (2009). Estimating the size of the bacterial pan-genome.

- 942           *Trends in Genetics*, 25, 107–110.
- Lassalle, F., Périan, S., Bataillon, T., Nesme, X., Duret, L. & Daubin, V. (2015). GC-
- 944           content evolution in bacterial genomes: The biased gene conversion hypothesis expands.  
*PLOS Genetics*, 11, e1004941.
- 946   Lenhart, J.S., Schroeder, J. W., Walsh, B. W., & Simmons, L. A. (2012). DNA repair and  
          genome maintenance in *Bacillus subtilis*. *Microbiology and Molecular Biology Reviews*,
- 948           76, 530–564.
- Lennon, J. T., & Jones, S. E. (2011). Microbial seed banks: the ecological and
- 950           evolutionary implications of dormancy. *Nature Reviews Microbiology*, 9, 119–30.
- Levin, D. A. (1990). The seed bank as a source of genetic novelty in plants. *The*
- 952           *American Naturalist*, 135, 563–572.
- Levin-reisman, I., Ronin, I., Gefen, O., Braniss, I., Shoresh, N., & Balaban, N. Q. (2017).
- 954           Antibiotic tolerance facilitates the evolution of resistance. *Science*, 355, 1–10.
- Lewis, K. (2010). Persister cells. *Annual Review of Microbiology*, 64, 357-372.
- 956   Ling, H., Boudsocq, F., Woodgate, R., & Yang, W. (2001). Crystal structure of a Y-family DNA  
          polymerase in action: a mechanism for error-prone and lesion-bypass replication. *Cell*,
- 958           107, 91-102.
- Locey, K. J., Fisk, M. C., & Lennon, J. T. (2017). Microscale insight into microbial seed banks.
- 960           *Frontiers in Microbiology*, 7, 2040
- Lomstein, B. A., Langerhuus, A. T., D’Hondt, S., Jørgensen, B. B., & Spivack, A. J.
- 962           (2012). Endospore abundance, microbial growth and necromass turnover in deep sub-  
          seafloor sediment. *Nature*, 484, 101–104.
- 964   Lynch, M. (2007). *The Origins of Genome Architecture*. Sunderland, MA: Sinauer

Associates.

- 966 Lynch, M., Ackerman, M. S., Gout, J.-F., Long, H., Sung, W., Thomas, W. K., & Foster,  
P. L. (2016). Genetic drift, selection and the evolution of the mutation rate.  
968 *Nature Reviews Genetics*, 17, 704–714.
- Lynch, M., Blanchard, J., Houle, D., Kibota, T., Schultz, S., Vassilieva, L., & Willis, J. (1999).  
970 Perspective: Spontaneous Deleterious Mutation. *Evolution*, 53, 645–663.
- Lynch, M., Bürger, R., Butcher, D., & Gabriel, W. (1993). The mutational meltdown in  
972 asexual populations. *The Journal of Heredity*, 84, 339–344.
- Lynch, M., & Marinov, G. K. (2015). The bioenergetic costs of a gene. *Proceedings of*  
974 *the National Academy of Sciences, USA*, 112, 15690–15695.
- MacLean, C. R., Torres-Barceló, C., & Moxon, R. (2013). Evaluating evolutionary models of  
976 stress-induced mutagenesis in bacteria. *Nature Reviews Genetics*, 14, 221–227
- Malik, T. & Smith, H. L. (2008). Does dormancy increase fitness of bacterial populations  
978 in time-varying environments? *Bulletin of Mathematical Biology*, 70, 1140–1162.
- Marin, J., Battistuzzi, F. U., Brown, A. C., & Hedges, S. B. (2017). The timetree of  
980 prokaryotes: New insights into their evolution and speciation. *Molecular Biology*  
*and Evolution*, 34, 437–446.
- 982 Marks, P. L. (1974). The Role of Pin Cherry (*Prunus pensylvanica* L.) in the Maintenance of  
Stability in Northern Hardwood Ecosystems. *Ecological Monographs*, 44, 73–88.
- 984 Marttinen, P., & Hanage, W. P. (2017). Speciation trajectories in recombining bacterial species.  
*PLoS Computational Biology*, 13, e1005640.
- 986 Maughan, H., Masel, J., Birky, C. W., & Nicholson, W. L. (2007). The roles of mutation

- accumulation and selection in loss of sporulation in experimental populations of *Bacillus*  
988 *subtilis*. *Genetics*, 177, 937–948.
- McHenry, C. S. (2011). Breaking the rules: bacteria that use several DNA polymerase IIIs.  
990 *EMBO Reports*, 12, 408-414
- Medini, D., Donati, C., Tettelin, H., Massignani, V., & Rappuoli, R. (2005). The microbial  
992 pan-genome. *Current Opinion in Genetics & Development*, 15, 589–594.
- Mell, J. C., & Redfield, R. J. (2014). Natural Competence and the Evolution of DNA Uptake  
994 Specificity. *Journal of Bacteriology*, 196, 1471-1483
- Mira, A., Pushker, R., Legault, B. A., Moreira, D., & Rodríguez-Valera, F. (2004).  
996 Evolutionary relationships of *Fusobacterium nucleatum* based on phylogenetic  
analysis and comparative genomics. *BMC Evolutionary Biology*, 4, 50.
- 998 Mizrahi, V., & Andersen, S. J. (1998). DNA repair in *Mycobacterium tuberculosis*. What  
have we learnt from the genome sequence? *Molecular Microbiology*, 29, 1331–1339.
- 1000 Moeller, R., Setlow, P., Reitz, G., & Nicholson, W. L. (2009). Roles of small, acid-  
soluble spore proteins and core water content in survival of *Bacillus subtilis*  
1002 spores exposed to environmental solar UV radiation. *Applied and Environmental*  
*Microbiology*, 75, 5202–5208.
- 1004 Moeller, R., Raguse, M., Reitz, G., Okayasu, R., Li, Z., Klein, S. ... Nicholson, W. L.  
(2014). Resistance of *Bacillus subtilis* spore DNA to lethal ionizing radiation damage  
1006 relies primarily on spore core components and DNA repair, with minor effects of oxygen  
radical detoxification. *Applied and Environmental Microbiology*, 80, 104–109.
- 1008 Mukamolova, G. V., Kaprelyants, A. S., Young, D. I., Young, M. & Kell, D. B. A.

- (1998). A bacterial cytokine. *Proceedings of the National Academy of Sciences, USA*, 95,  
1010 8916–8921.
- Mukamolova, G. V., Turapov, O., Malkin, J., Woltmann, G., & Barer, M. R. (2010).  
1012 Resuscitation-promoting factors reveal an occult population of tubercle Bacilli in  
Sputum. *American Journal of Respiratory and Critical Care Medicine*, 181, 174–80.
- 1014 Muller, H. J. (1964). The relation of recombination to mutational advance. *Mutation  
Research*, 106, 2–9.
- 1016 Müller, A. L., de Rezende, J. R., Hubert, C. R. J., Kjeldsen, K. U., Lagkouvelos, I.,  
Berry, D., ... Loy, A. (2014). Endospores of thermophilic bacteria as tracers of  
1018 microbial dispersal by ocean currents. *The ISME Journal*, 8, 1153–1165.
- Nicholson, W.L., Munakata, N., Horneck, G., Melosh, H. J., & Setlow, P. (2000).  
1020 Resistance of *Bacillus* endospores to extreme terrestrial and extraterrestrial environments.  
*Microbiology and Molecular Biology Reviews*, 64, 548–572.
- 1022 Nicholson, W.L., Schuerger, A. C., & Setlow, P. (2005). The solar UV environment and  
bacterial spore UV resistance: considerations for Earth-to-Mars transport by natural  
1024 processes and human spaceflight. *Mutation Research*, 571, 249–264.
- Nunney, L. (2002). The effective size of annual plant populations: The interaction of a  
1026 seed bank with fluctuating population size in maintaining genetic variation. *The  
American Naturalist*, 160, 195–204.
- 1028 Ochman, H., Lawrence, J. G., & Groisman, E. A. (2000). Lateral gene transfer and the  
nature of bacterial innovation. *Nature*, 405, 299–304.
- 1030 Oliver, J. D. (1995). The viable but non-culturable state in the human pathogen *Vibrio  
vulnificus*. *FEMS Microbiology Letters*, 133, 203–208.

- 1032 Olivieri, I. (2001). The evolution of seed heteromorphism in a metapopulation:  
interactions between dispersal and dormancy. *In* “Integrating Ecology and  
1034 Evolution in a Spatial Context” (J. Silvertown and J. Antonovics eds.), pp. 245-268.  
Oxford: Cambridge University Press.
- 1036 O'Neill J. (2014). Review on Antimicrobial Resistance Antimicrobial Resistance: Tackling a  
crisis for the health and wealth of nations. London: Review on Antimicrobial Resistance.
- 1038 Orr, H. A. (2005). The genetic theory of adaptation: a brief history. *Nature Reviews Genetics*, 6,  
119-127
- 1040 Park, S.-C., Simon, D., & Krug, J. (2010). The speed of evolution in large asexual  
populations. *Journal of Statistical Physics*, 138, 381-410.
- 1042 Pawlowski, D. R., Metzger, D. J., Raslawsky, A., Howlett, A., Siebert, G., Karalus, R. J.  
... Whitehouse, C. A. (2011). Entry of *Yersinia pestis* into the viable but nonculturable  
1044 state in a low-temperature tap water microcosm. *PLoS ONE*, 6, e17585.
- Plotkin, J. B., & Kudla, G. (2011). Synonymous but not the same: the causes and  
1046 consequences of codon bias. *Nature Reviews Genetics*, 12, 32–42.
- Ramirez-Guadiana, F. H., Barraza-Salas, M., Ramirez-Ramirez, N., Ortiz-Cortes, M.,  
1048 Setlow, P., & Pedraza-Reyes, M. (2012). Alternative excision repair of ultraviolet B- and  
C-induced DNA damage in dormant and developing spores of *Bacillus subtilis*. *Journal*  
1050 *of Bacteriology*, 194, 6096–6104.
- Rayssiguier, C., Thaler, D. S., Radman, M. (1989). The barrier to recombination between  
1052 *Escherichia coli* and *Salmonella typhimurium* is disrupted in mismatch-repair mutants.  
*Nature*, 342, 396–401.
- 1054 Rittershaus, E. S. C., Baek, S., & Sasseti, C. M. (2013). The normalcy of dormancy:

- common themes in microbial quiescence. *Cell Host & Microbe* 13, 643–651.
- 1056 Rosenberg, S. M. (2001). Evolving responsively: adaptive mutation. *Nature Reviews Genetics*, 2, 504-515.
- 1058 Rosselló-Móraa, R., & Amann, R. (2015). Past and future species definitions for Bacteria and Archaea. *Systematic and Applied Microbiology*, 38, 209-216.
- 1060 Setlow, P. (1992). I will survive: protecting and repairing spore DNA. *Journal of Bacteriology*, 174, 2737–2741.
- 1062 Setlow, P. (2006). Spores of *Bacillus subtilis*: their resistance to and killing by radiation, heat and chemicals. *Journal of Applied Microbiology*, 101, 514–525.
- 1064 Shapiro, B. J. (2016). How clonal are bacteria over time? *Current Opinion in Microbiology*, 31, 116–123.
- 1066 Sharp, P. M., Bailes, E., Grocock, R. J., Peden, J. F., & Sockett, R. E. (2005). Variation in the strength of selected codon usage bias among bacteria. *Nucleic Acids Research*. 33, 1141-1153.
- 1068 Sharp, P. M., & Li, W.-H. (1987). The rate of synonymous substitution in enterobacterial genes is inversely related to codon usage bias. *Molecular Biology and Evolution*, 4, 222-230.
- 1070 Simons, A. M. (2009). Fluctuating natural selection accounts for the evolution of diversification bet hedging. *Proceedings of the Royal Society B: Biological Sciences*, 276, 1987–1992.
- 1072 Smith, J. M., & Haigh, J. (1974). The hitch-hiking effect of a favourable gene. *Genetical Research*, 23, 23–35.
- 1074 Smith, J. M., Smith, N. H., Rourke, M. O., & Spratt, B. G. (1993). How clonal are bacteria? *Proceedings of the National Academy of Sciences, USA*, 90, 4384–4388.

- 1078 Starnawski, P., Bataillon, T., Ettema, T. J. Jochum, L. M., Schreiber, L., Chen, X. ...  
Kjeldsen, K. U. (2017). Microbial community assembly and evolution in  
1080 subseafloor sediment. *Proceedings of the National Academy of Sciences, USA*, 114,  
2940–2945.
- 1082 Takeuchi, N., Kaneko, K., & Koonin, E. V. (2014). Horizontal Gene Transfer Can Rescue  
Prokaryotes from Muller’s Ratchet: Benefit of DNA from Dead Cells and Population  
1084 Subdivision. *G3: Genes, Genomes, Genetics*, 4, 325-339.
- Tan, I. S., & Ramamurthi, K. S. (2014). Spore formation in *Bacillus subtilis*. *Environmental*  
1086 *Microbiology Reports*, 6, 212–225.
- Tellier, A., Laurent, S. J. Y., Lainer, H., Pavlidis, P., & Stephan, W. (2011). Inference of  
1088 seed bank parameters in two wild tomato species using ecological and genetic  
data. *Proceedings of the National Academy of Sciences, USA*, 108, 17052–17057.
- 1090 Templeton, A. R., & Levin, D. A. (1979). Evolutionary consequences of seed pools. *The*  
*American Naturalist*, 114, 232–249.
- 1092 Tenailon, O., Barrick, J. E., Ribbeck, N., Deatherage, D. E., Blanchard, J. L., Dasgupta,  
A., ... Lenski, R. E. (2016). Tempo and mode of genome evolution in a 50,000-  
1094 generation experiment. *Nature*, 536, 165–170.
- Tuorto, S. J., Darias, P., McGuinness, L. R., Panikov, N., Zhang, T., Häggblom, M. M.,  
1096 & Kerkhof, L. J. (2014). Bacterial genome replication at subzero temperatures in  
permafrost. *The ISME Journal*, 8, 139–149.
- 1098 van Bodegom, P. (2007). Microbial maintenance: a critical review on its quantification.  
*Microbial Ecology*, 53, 513–523.
- 1100 Venable, D. L., & Brown, J. S. (1988). The selective interactions of dispersal, dormancy,



- and seed size as adaptations for reducing risk in variable environments. *The American Naturalist*, 131, 360–384.
- 1102
- Venable, D. L., & Lawlor, L. (1980). Delayed germination and dispersal in desert
- 1104 annuals: Escape in space and time. *Oecologia*, 46, 272–282.
- Vitalis, R., Glémin, S., & Olivieri, I. (2004). When genes go to sleep: the population
- 1106 genetic consequences of seed dormancy and monocarpic perenniality. *The American Naturalist*, 163, 295–311.
- 1108 Votyakova, T., Kaprelyants, A., & Kell, D. B. (1994). Influence of viable cells on the
- resuscitation of dormant cells in *Micrococcus luteus* cultures held in an extended
- 1110 stationary phase: the population effect. *Applied and Environmental Microbiology*, 60,
- 3284–3291.
- 1112 Vreeland, R. H., Rosenzweig, W. D., & Powers, D. W. (2000). Isolation of a 250 million-
- year-old halotolerant bacterium from a primary salt crystal. *Nature*, 407, 897–900.
- 1114 Walker, H. H., & Winslow, C.-E. A. (1932). Metabolic Activity of the Bacterial Cell at Various
- Phases of the Population Cycle. *Journal of Bacteriology*, 24, 209–241.
- 1116 Wang, G. S., Mayes, M. A., Gu, L. H., and Schadt, C. W. (2014). Representation of dormant and
- active microbial dynamics for ecosystem modeling. *PLoS ONE*, 9, 10.
- 1118 Weinbauer, M., & Rassoulzadegan, F. (2007). Extinction of microbes: evidence and potential
- consequences. *Endangered Species Research*, 3, 205–215.
- 1120 Weller, C., & Wu, M. (2015). A generation-time effect on the rate of molecular evolution
- in bacteria. *Evolution*, 69, 643–652.
- 1122 Willis, C. G., Baskin, C. C., Baskin, J. M., Auld, J. R., Venable, D. L., Cavender-Bares,

- J., Donohue, K., ... NESCent Germination Working Group. (2014). The evolution of  
1124 seed dormancy: environmental cues, evolutionary hubs, and diversification of the seed  
plants. *New Phytologist*, 203, 300–309.
- 1126 Witkin, E. M. (1976). Ultraviolet mutagenesis and inducible DNA repair in *Escherichia*  
*coli*. *Bacteriological Reviews*, 40, 869-907.
- 1128 Wood, T. K., Knabel, S. J., & Kwan, B. W. (2013). Bacterial persister cell formation and  
dormancy. *Applied and Environmental Microbiology*, 79, 7116–7121.
- 1130 World Health Organization. (2014). Antimicrobial resistance: 2014 global report on surveillance.  
World Health Organization. Chicago
- 1132 Zhang, Y. (2014). Persisters, persistent infections and the Yin–Yang model. *Emerging*  
*Microbes & Infections*, 3, e3.
- 1134 Zhaxybayeva, O., Swithers, K. S., Lapierre, P., Fournier, G. P., Bickhart, D. M., DeBoy,  
R. T. ... Noll, K. M. (2009). On the chimeric nature, thermophilic origin, and  
1136 phylogenetic placement of the *Thermotogales*. *Proceedings of the National Academy of*  
*Sciences, USA*, 106, 5865–5870.
- 1138 Živković, D., & Tellier, A. (2012). Germ banks affect the inference of past demographic  
events. *Molecular Ecology*, 21, 5434–5446.
- 1140
- 1142
- 1144
- 1146

## FIGURE CAPTIONS

1148 **Figure 1:** Transitioning in and out of a seed bank is analogous to the migration of individuals  
between populations. In **a)** we see a population with a seed bank where individuals switch  
1150 between active and dormant states. In **b)** we see two populations where individuals can migrate  
between each population. An important difference between **a)** and **b)** is that individuals must  
1152 originate in the active pool, because dormant individuals cannot reproduce. While dormant  
individuals can die in this model, their death rate is much lower than that of active individuals.  
1154 This conceptual model was first presented in an ecological context (Lennon & Jones, 2011) and  
later used for the seed bank coalescent (Blath et al., 2015).

1156  
**Fig. 2:** The single cell metabolic activity distribution in a bacterial population at different time-  
1158 points. The bacterium used is a strain of *Janthinobacterium*, an aerobic, Gram-negative, soil-  
dwelling  $\beta$ -proteobacteria. The blue, yellow, and red histograms represent samples taken at 3, 9,  
1160 and 200 hours after the culture was inoculated, respectively. The distribution of metabolic  
activity depends on the growth state of the population, where the mode decreases as well as the  
1162 shape of the distribution as the population enters a dormant state. During the process of  
resuscitation the mode increases corresponding to an increase in growth rate (see Supplemental  
1164 Materials).

1166 **Figure 3: a)** The expected level of nucleotide diversity ( $E[\pi]$ ) for a sample of active individuals  
increases with the number of generations that an individual on average spends in the seed bank  
1168 for a population at mutation-drift equilibrium with a given population-scaled mutation rate  
( $\theta = 2N\mu$ ). Here  $N$  is the number of active individuals,  $M$  is the number of dormant individuals,

1170 and  $\mu$  is the mutation rate for active individuals, where diversity is estimated as  $\mathbf{E}[\pi] = \theta +$   
1171  $\theta \left(\frac{M}{N}\right)$  (Blath et al., 2015, eq. 21). The average number of generations that an individual spends in  
1172 the seed bank can be modeled as a geometric distribution, where the probability of exiting the  
1173 seed bank each generation is  $\frac{c}{M}$  and  $c$  is the number of individuals that exit the seed bank each  
1174 generation (Blath et al., 2015; 2016). The vertical grey-dashed line represents the point where the  
1175 average number of generations that an individual spends in the seed bank is greater than the  
1176 number of active individuals in the populations (i.e., the strong seed-bank threshold). Vertical  
1177 lines represent  $\mathbf{E}[\pi]$  for a population without a seed bank in mutation-drift equilibrium. **b)** The  
1178 length of time required to reach mutation-drift equilibrium increases with the average number of  
1179 generations that an individual spends in the seed bank. These results are from a simulated  
1180 population evolving over time that is subject only to mutation and drift with a constant seed bank  
1181 size. In both **a)** and **b)** We assume that dormant individuals do not acquire mutations. See  
1182 Supplementary Information for more detail on implementation of model.

1184 **Figure 4:** We performed population genetic simulations to determine the extent that dormancy  
1185 alters the trajectory of a beneficial allele destined to go to fixation and the average length of time  
1186 until it is fixed ( $T_{fix}$ ). Simulations were performed on a population containing 1,000 active and  
1187 10,000 dormant individuals, where one active individual acquired a beneficial mutation with a  
1188 1% fitness advantage. **a)** As the average number of generations that an individual spends in a  
1189 dormant state increases, we see that the trajectory of a beneficial allele destined for fixation  
1190 changes shape. For example, after reaching an allele frequency of  $\sim 0.5$  (horizontal grey dashed  
1191 line), the rate that the beneficial allele increases in frequency drastically slows down when  
1192 individuals remain dormant for 10,000 generations on average. **b)** The length of time until  $T_{fix}$

for both active and dormant individuals scales with the average number of generations that an  
1194 individual spends in a dormant state. However,  $T_{fix}$  for the active portion of the population  
decreases once the average number of generations that an individual spends in a dormant state is  
1196 higher than the number of active individuals in the population (vertical grey line). After this  
point,  $T_{fix}$  for the active portion of the population quickly approaches  $T_{fix}$  for an idealized  
1198 population where the total population size is equal to the number of active individual (horizontal  
grey line) (Eriksson et al., 2008, eq. 37). These results for **a)** and **b)** were obtained from a  
1200 simulated Moran model of a selective sweep with a seed bank (see Supplementary Materials for  
details).

1202

**Figure 5: a)** The evolutionary distance (calculated as the root-to-tip sum on the branch of the  
1204 phylogeny) declines as the number of sporulation-associated genes increases among *Firmicutes*  
taxa, a common group of bacteria found in soils and hosts. The publically available data  
1206 presented here is from the *Firmicutes* phylogeny of conserved genes (Weller & Wu, 2015). **b)**  
The evolutionary distance (calculated as the JC69 corrected distance) decreases as the average  
1208 length of time that an individual spends in the seed bank increases (see Supplementary  
Materials). The lines in both **a)** and **b)** are the slopes from simple linear regression.

1210

1212

1214

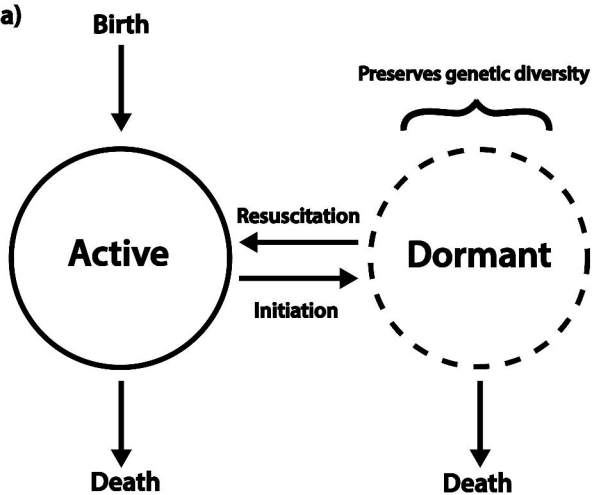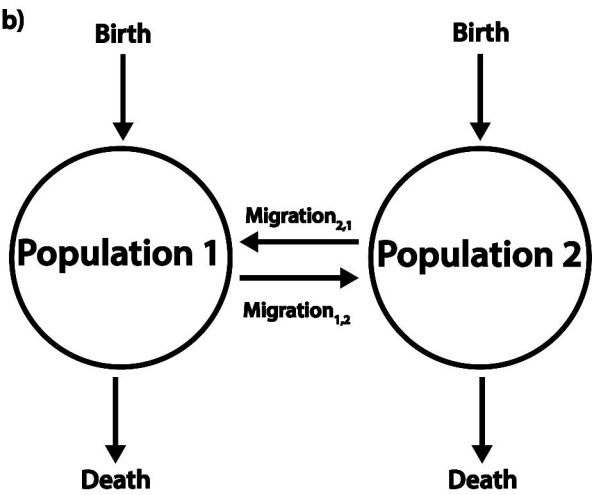

# The distribution of reductase activity in a microbial population

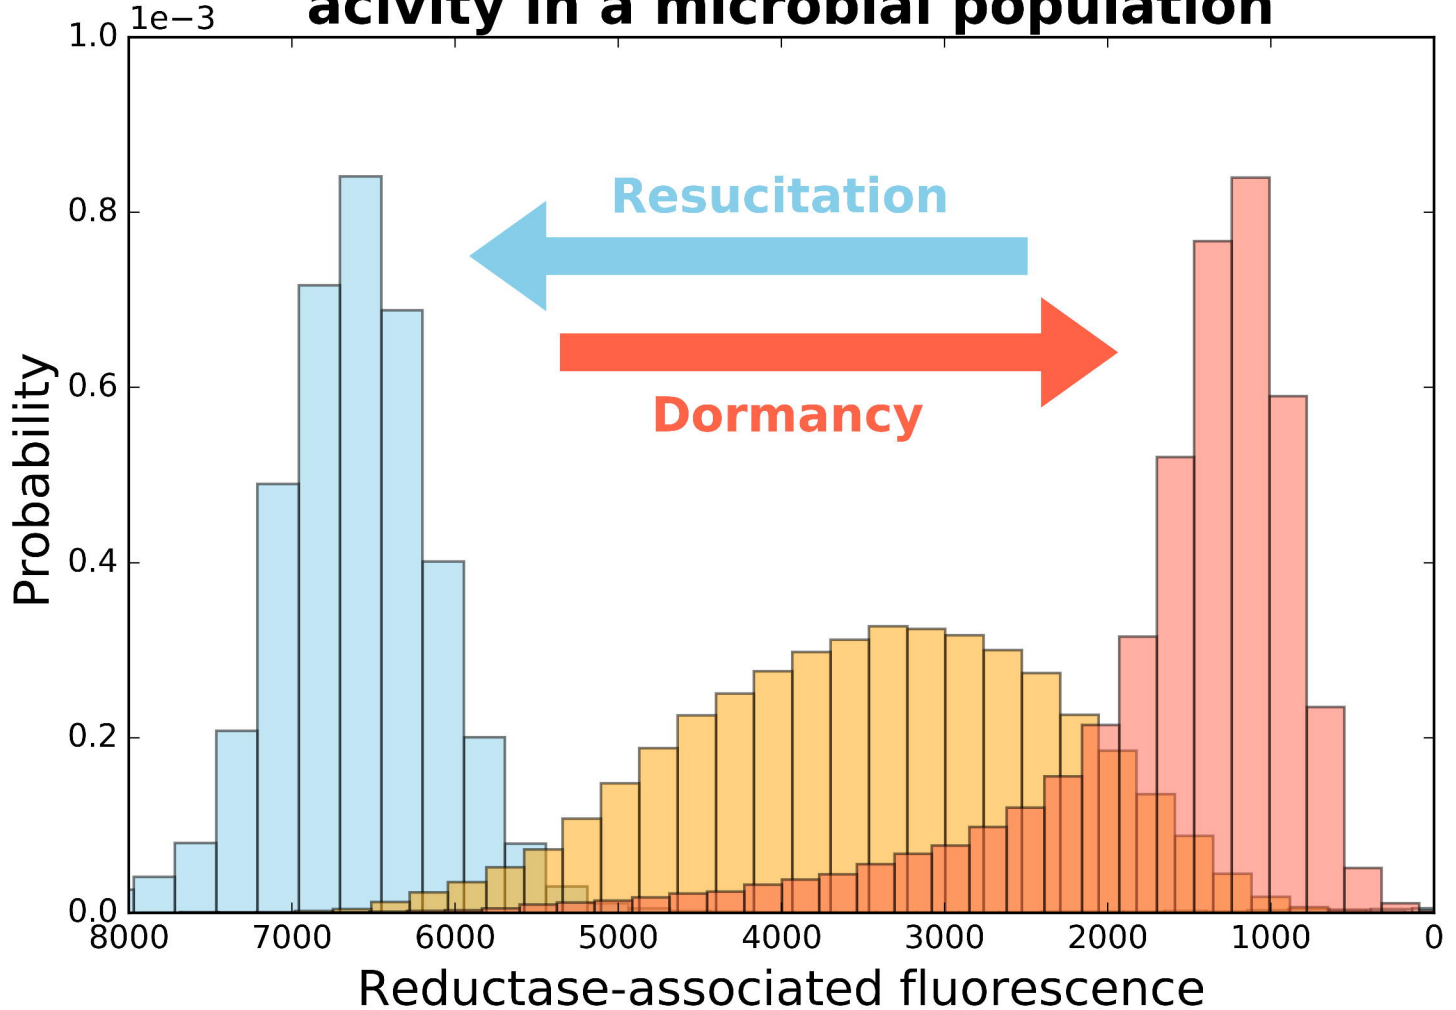

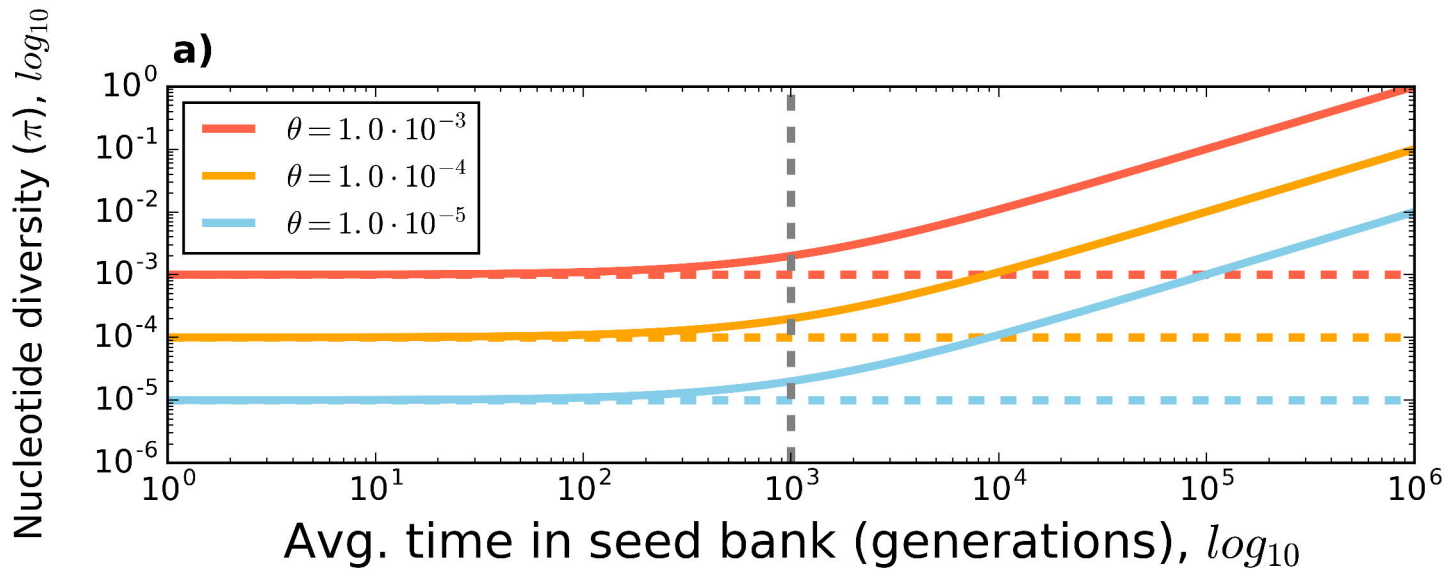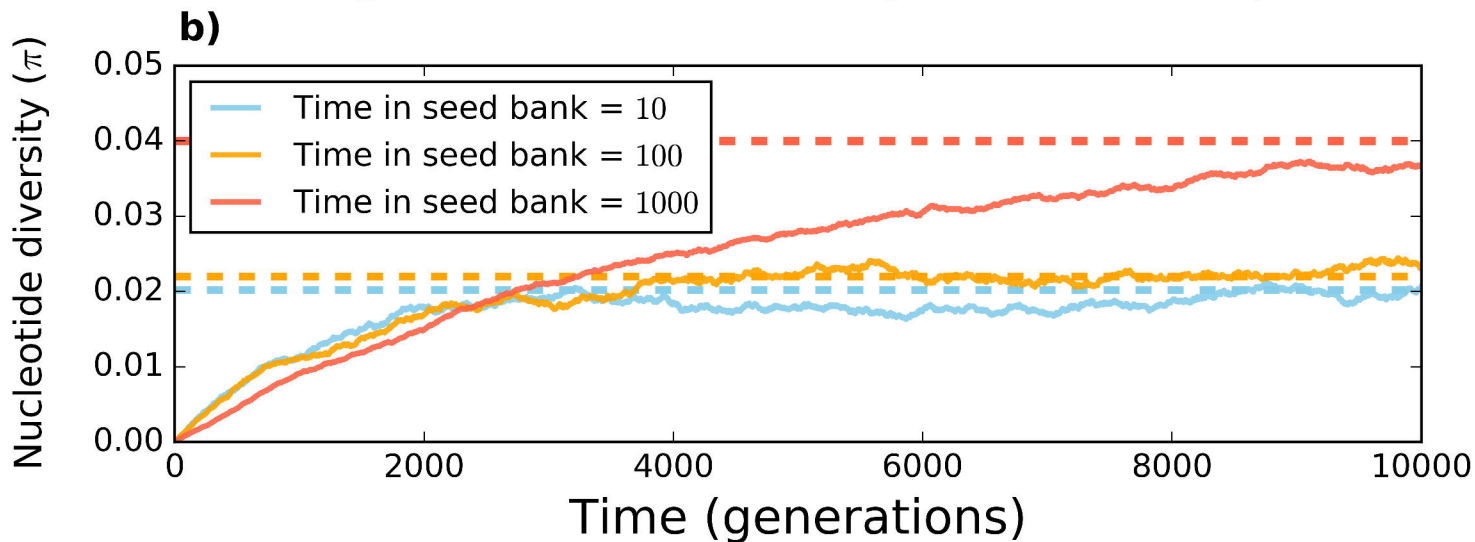



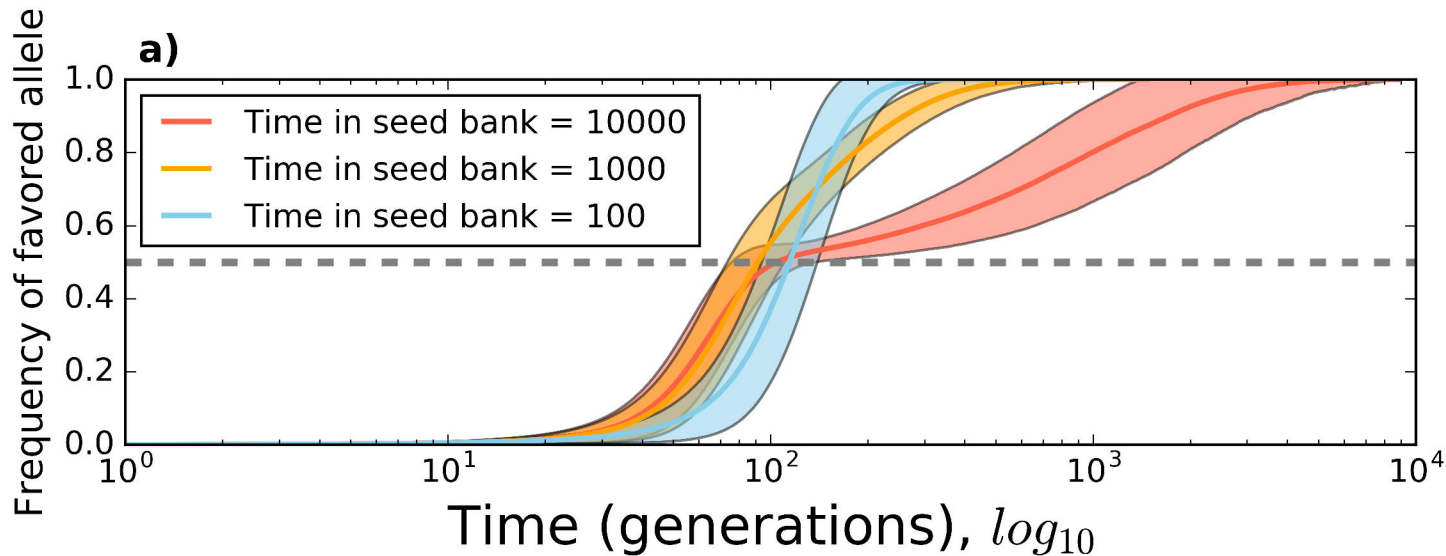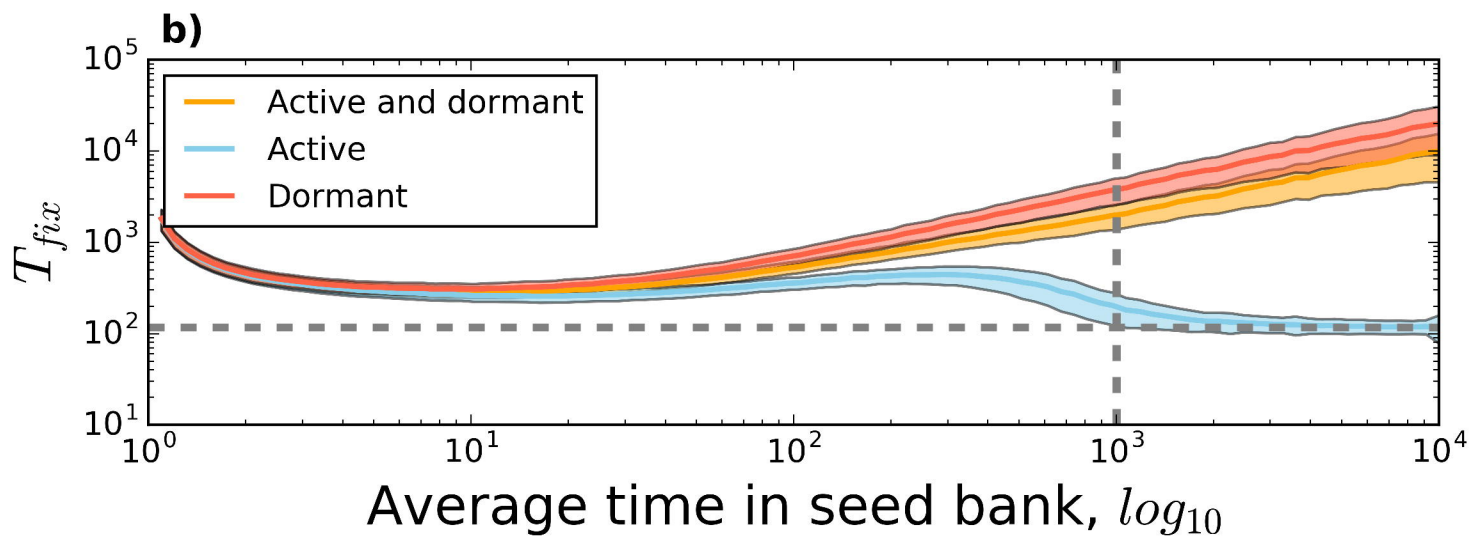

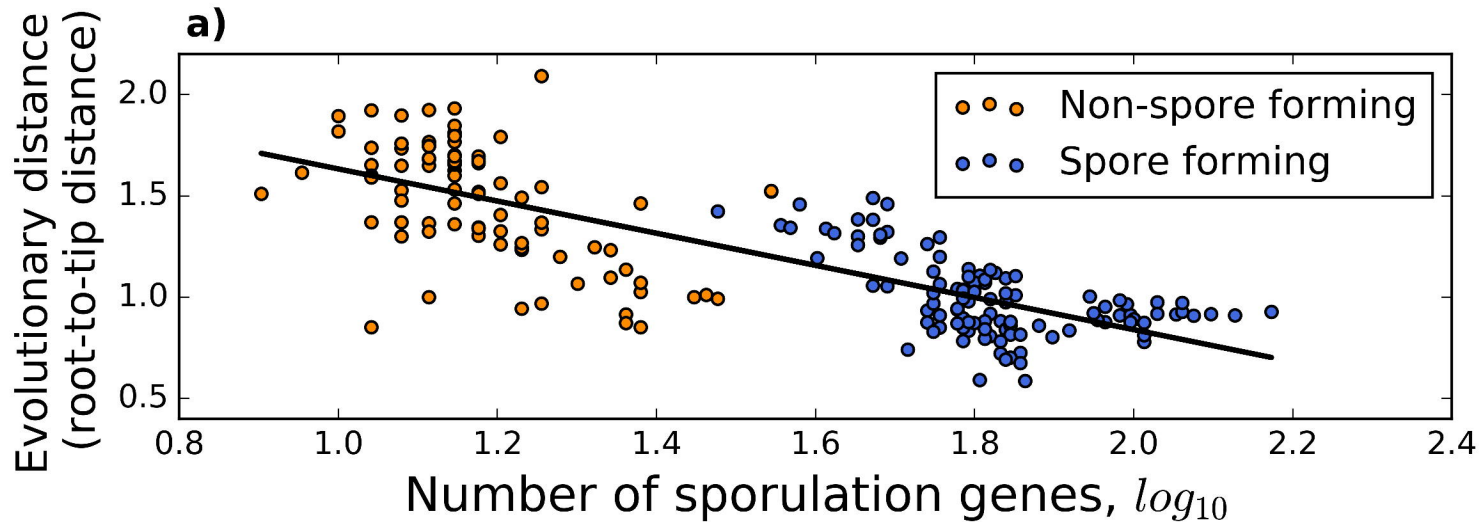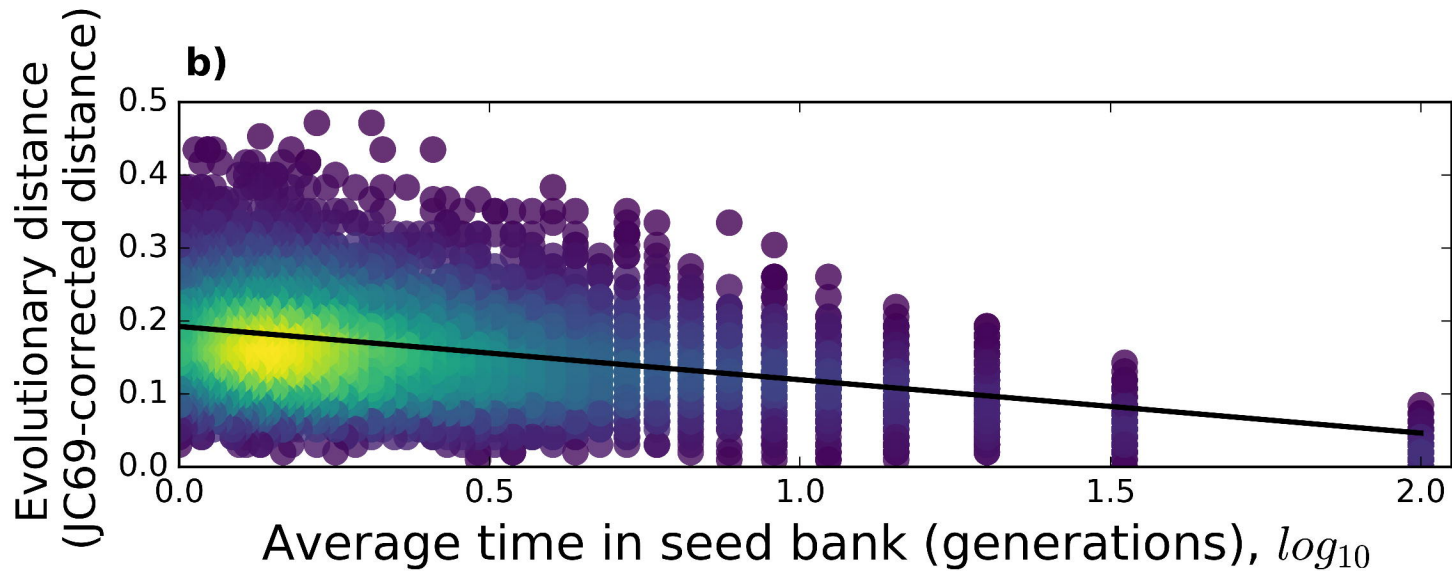

Source: https://www.biorxiv.org/content/10.1101/156356v3.full.pdf
